# Supplementary material for: ER Chaperone HYOU1 Couples MAM Remodeling to Autophagic Lipid Clearance in Atherosclerosis
Source: Research Square preprint supplement (doi:10.21203/rs.3.rs-7276074/v1), 2025-08-27
Supplement: Supplementary file 1 [file c396aef3bbe40a49e6880ab0.docx]

**Supplemental information**

**ER Chaperone HYOU1 Couples MAM Remodeling to Autophagic Lipid Clearance in Atherosclerosis**

Minjeong Ko1, Jungmin Ha1, Sunyoung Kwon2, Hye Eun Lee2, Ji Young Mun2, Danbi Yoon3, Jiho Yoo3, Hyunhwa Cho4, Minho Lee4, Shin Hee Park5, Jae-Hoon Choi5, Yeji Lee6, Sangsu Bae6,7, Ju Yeon Lee8,9, Jin Young Kim8,9, Seung Hee Shin10, Myeong Hee Moon10, and Ho Jeong Kwon1,*

1Chemical Genomics Leader Research Laboratory, Department of Biotechnology, College of Life Science and Biotechnology, Yonsei University, Seoul, Republic of Korea

2Neural Circuit Research Group, Korea Brain Research Institute, Daegu, Republic of Korea

3College of Pharmacy, Chung-Ang University, Seoul, Republic of Korea

4Department of Life Science, Dongguk University-Seoul, Goyang-si, Republic of Korea

5Department of Life Science, College of Natural Sciences, Hanyang University, Seoul, Republic of Korea

6Institute of Molecular Biology and Genetics, Seoul National University, Seoul, Republic of Korea

7Genomic Medicine Institute, Cancer Research Institute, and Department of Biomedical Sciences, Seoul National University College of Medicine, Seoul, Republic of Korea

8Digital Omics Research Center, Korea Basic Science Institute, Ochang, Republic of Korea

9Critical Diseases Diagnostics Convergence Research Center, Korea Research Institute of Bioscience and Biotechnology, Daejeon, Republic of Korea

10Department of Chemistry, Yonsei University, Seoul, Republic of Korea

*Corresponding author: Ho Jeong Kwon, kwonhj@yonsei.ac.kr

Tel: +82-2-2123-5883, Fax: +82-2-362-7265

This file includes:

Supplementary Materials & Methods

Supplementary Figure 1 to 11

# Supplementary Materials & Methods

| **Reagent and resources** | | **Source** | **Cat. No** |
| --- | --- | --- | --- |
| Chemicals and reagents | | | |
| Cryptotanshinone | | Sigma-Aldrich  (St. Louis, MO) | C5624 |
| Histamine dihydrochloride | | H7250 |
| Chloroquine | | C6628 |
| Oil Red O | | O0625 |
| PEG 300 | | 91462 |
| Tween 80 | | P1754 |
| Cryptotanshinone | | MedChemExpress  (Princeton, NJ) | HY-N0174 |
| Rapamycin | | TCI Chemicals  (Tokyo, Japan) | R0097 |
| Bafilomycin A1 | | Glentham Life Sciences  (Wiltshire, UK) | GA6363 |
| OxLDL | | Invitrogen (Thermo Fisher Scientific)  (Waltham, MA) | L34357 |
| DiI-OxLDL | | L34358 |
| Rhod-2, AM | | R1244 |
| Fluo-4, AM | | F14217 |
| LysoTracker Red | | L7528 |
| MitoTracker Green | | M7514 |
| MitoSOX | | M36008 |
| BODIPY | | D3922 |
| Hoechst 33342 | | H3570 |
| Dynabeads | | 10003D |
| Lipofectamine™ RNAiMAX Transfection Reagent | | 13778150 |
| Lipofectamine™ LTX Reagent with PLUS™ Reagent | | 15338100 |
| Lipofectamine™ 3000 Transfection Reagent | | L3000015 |
| Protease Inhibitor Cocktail | | Thermo Fisher Scientific  (Waltham, MA) | 78438 |
| pronase | | Roche  (Basel, Switzerland) | 10165913103 |
| RBC lysis buffer | | 11814389001 |
| 3-(4,5-dimethylthiazol-2-yl)-2,5-diphenyltetrazolium bromide (MTT) | | VWR Life Science (Avantor)  (Radnor, PA) | 0793 |
| jetOPTIMUS transfection reagent | | Polyplus  (Illkirch, France) | 101000051 |
| Antibodies for western blot | | | |
| SQSTM1/p62 antibody | | Cell Signaling Technology  (Danvers, MA) | 5114 |
| LC3B antibody | | 2775 |
| TFEB antibody | | 4240 |
| HYOU1 antibody | | 13452 |
| GRP75 antibody | | 3953 |
| GAPDH antibody | | 5174 |
| GRP78 / BiP antibody | | Abcam  (Cambridge, UK) | 21685 |
| Myc tag antibody | | 18185 |
| beta Actin antibody | | 6276 |
| beta Tubulin antibody | | 6046 |
| DDIT3/CHOP antibody | | ABclonal  (Woburn, MA) | A21902 |
| IP3R-I/II/III antibody | | Santa Cruz Biotechnology  (Dallas, TX) | sc-377518 |
| Lamin A/C antibody | | sc-376248 |
| Antibodies for Immunofluorescence | | | |
| LC3B antibody | | Abcam | ab48394 |
| SQSTM1 / p62 antibody | | ab56416 |
| Alexa Fluor™ 594 Secondary Antibody | | Invitrogen | A-11012 |
| Alexa Fluor™ 488 Secondary Antibody | | A-11001 |
| Antibody pairs for PLA | | | |
| Ms | IP3R-I/II/III antibody | Santa Cruz Biotechnology | sc-377518 |
| Rb | VDAC1 antibody | Abclonal | A19707 |
| Ms | IP3R-I antibody | Santa Cruz Biotechnology | sc-271197 |
| Rb | VDAC1 antibody | Abclonal | A19707 |
| Ms | IP3R-I antibody | Santa Cruz Biotechnology | sc-271197 |
| Rb | ORP150 (HYOU1) antibody | Abcam | ab134944 |
| Ms | ORP150 (HYOU1) antibody | Santa Cruz Biotechnology | sc-398224 |
| Rb | GRP78 antibody | Abcam | Ab21685 |
| Ms | IP3R-I antibody | Santa Cruz Biotechnology | sc-271197 |
| Rb | GRP78 antibody | Proteintech | Ab21685 |
| Ms | IP3R-I antibody | Santa Cruz Biotechnology | sc-271197 |
| Rb | GRP75 antibody | Proteintech | 14887-1-AP |
| Ms | VDAC1 antibody | Santa Cruz Biotechnology | sc-390996 |
| Rb | GRP75 antibody | Proteintech | 14887-1-AP |
| Plasmids | | | |
| mRFP-EGFP-LC3B | | addgene | 21074 |
| SPLICS Mt-ER (Long) | | Gift from Dr. D.H. Cho (Kyungpook National Univ., Korea) | N/A |
| G-CaMP3 | | addgene | 22692 |
| HYOU1 (Myc-DDK-tagged) human ORF Clone | | OriGene Technologies  (Rockville, MD) | RC214178 |
| siRNAs | | | |
| ON-TARGETplus Human HYOU1 siRNA | | Horizon Therapeutics  (Cambridge, UK) | L-003678-00 |
| ON-TARGETplus Mouse Hyou1 siRNA | | L-057245-01 |
| Cell culture | | | |
| Human umbilical vein endothelial cell (HUVEC) | | Lifeline Cell Technology  (Frederick, MD) | FC-0003 |
| HEK293 | | Korean Cell Line Bank | 21573 |
| HepG2 | | Korean Cell Line Bank | 88065 |
| Raw 264.7 | | Korean Cell Line Bank | 40071 |
| HEK293T | | Gift from Dr. S. Bae (Seoul National Univ., Korea) | N/A |
| ATG3 knockout HeLa | | Gift from Dr. S-W. Yu (DIGIST, Korea) | N/A |
| EGM™-2 Endothelial Cell Growth Medium-2 BulletKit™ | | Lonza | CC-3162 |
| DMEM (Dulbecco′s Modified Eagle′s Medium) | | Gibco(Thermo Fisher Scientific)  (Waltham, MA) | 11995-065 |
| FBS (Fetal Bovine Serum) | | 16000-044 |
| Antibiotic-Antimycotic | | 15240-062 |
| Kits | | | |
| PLA: Duolink In Situ Red Kit | | Sigma-Aldrich | DUO92101 |
| PLA: NaveniFlex Cell MR Red kit | | Navinci Diagnostics  (Lund, Sweden) | NC.MR.100 |
| ATPlite 1step Luminescence Assay | | Revvity | 6016736 |
| Monolith Protein Labeling Kit RED-NHS 2nd Generation | | Nanotemper Technologies  (Munich, Germany) | MO-L011 |
| Premium Capillaries | | MO-K025 |
| Mitochondria isolation kit | | Thermo Fisher Scientific | 89874 |
| Mem-PER Plus Membrane Protein Extraction Kit | | 89842 |
| BCA assay | | 23227 |

**Criteria for Target Candidate Selection by DARTS-LC-MS/MS**

DARTS is a powerful method for target protein identification that does not require compound labeling and allows efficient analysis of protein-drug interactions. Upon binding to its target protein, a drug induces structural changes that stabilize the protein. Stabilized proteins exhibit increased resistance to protease digestion. By quantitatively comparing protein levels in the presence and absence of the CTS using LC-MS/MS, target binding proteins of CTS can be identified. Cell lysates were divided into three groups, then CTS and pronase were applied to each group, as follows: NT, pronase + DMSO, and pronase + CTS. For consistency, only proteins with a coefficient of variation (CV) <20% were selected. Proteins showing more than 10% degradation in the pronase-treated samples compared to the NT group were considered for further analysis ([(pronase)/(NT)] <0.9). The quantitative value of the (pronase + CTS) group could not theoretically exceed that of NT. An excess of less than 10% was considered an acceptable experimental error ([(pronase + CTS)/(NT)] <1.1). Finally, proteins from the (pronase + CTS) group with a fold change (FC) greater than 20% compared to the pronase only group were selected for further analysis ([(pronase + CTS)/(pronase)] >1.2).

**SWATH analysis of DARTS-LC-MS/MS**

Peptide solution were loaded into a trap column (C18, inner diameter (i.d.)180μm, length 20mm and particle size 5μm, Waters, Milford, MA) by an autosampler and then peptides were desalted and concentrated on the trap column for 5min with 5μL/min flow rate. Concentrated peptides were separated with back flushed way on a homemade microcapillary C18 analytical column (i.d. 100μm, length 200mm (Reprosil Pur 120, C18-AQ, particle size 3μm) at a 400nL/min flow rate. The mobile phases were composed of 99.9% deionized water (A) and 99.9% acetonitrile (B), and each contained 0.1% formic acid (FA). For peptides separation, 5% mobile phase B, ramped to 10% of B for 1 min, to 35% of B for 94min and then to 95% for 1 min, was held constant for 9 min and descended to 5% B for 1 min. After gradient, the column was re-equilibrated with 5% B for 14 min before the next injection. The nanoelectrospray was set 2.0kV voltage. triple time-of-flight mass spectrometry (TOF-MS) was performed using either an IDA MS or a SWATH MS. In IDA mode, a TOF-MS survey scan was acquired at m/z 250-1800 with 250ms accumulation time. For product ion scans, the 10 most intense precursor ions (2+ to 5+) within the survey scan were consecutively isolated and accumulated for 100 ms in the mass range m/z 250−1800, with rolling collision energy. Dynamic exclusion time of precursor ions was set at 45s after 2 occurrences. SWATH data were acquired three times for each sample. In SWATH mode, TOF-MS survey scans were acquired (m/z 400−2000, 50 ms) with the following setting values; 34 product ion scans, with consecutive constant Q1 windows (25 Da) in the mass range m/z 400−1250. Product ion spectra were accumulated for 50 ms in the mass range m/z 400−2000, with rolling collision energy.

**IDA Data-Based SWATH Library Generation**

MS/ MS data were subjected to database searches by ProteinPilotTM software (V4.5, AB Sciex) using the ParagonTM algorithm with Uniprot human database (November 2015 released) for searches. Search parameters were set as follows; Sample type: identification, Cys alkylation: iodoacetamide, Digestion: trypsin, Special factors: none and ID focus: allow biological modifications. The spectral libraries were produced in CSV format after loading the group file in PeakView (V2.2 with SWATH Quantitation plug-in) and SWATH MS peak area were also extracted using this library in PeakView. PeakView uses a set of processing settings to filter the ion library and determine which peptides or transitions should be used for quantification for extraction of SWATH peak area. These settings were composed with the followings: a maximum number of 25 peptides per protein to be included from the imported ion library; at least 5 transitions per peptide; a peptide 95% confidence threshold to remove the peptides with low confidence values; a false discovery rate (FDR) < 1% used to filter the SWATH extraction results; and 5 retention time window (min) and 50 mass tolerance window (ppm) for the extracted ion chromatogram. After SWATH peak extraction, the transition ion, peptide, and protein peak areas were exported into Excel for further statistical analysis. The ion peak areas exported by PeakView for each sample were normalized by total area using MarkerView 1.2.1. Specifically, the sum total of all ion intensities for each sample was calculated and the ion intensities of each sample was normalized using Total Area Sums by MarkerView. Normalized protein peak areas were automatically performed via the principal component analysis (PCA) and then grouped by principal component variance in MarkerView. These results were then exported into Excel format according to peptide and protein, which we refer to henceforth as peptide peak area and protein peak area. Finally, the results of proteins showing significant changes in expression level were checked by manual validation, and their peak areas were recalculated based solely on reliable peptide peaks.

**Lipidomic analysis**

Lipid extraction from the mitochondrial pellet was performed using MTBE/CH3OH. Frozen pellets were thawed by vortexing for proper extraction. 300 μL of 1x PBS was added to the thawed sample and the solution was homogenized via tip sonication for 2 min. Each sample was spiked with 15 μL of an internal standard mixture, followed by adding 300 μL methanol and incubating on ice for 10 min. Subsequently, 1 mL of MTBE was added to the solution. The mixture was vortexed for 1 h and centrifuged at 1000×g for 10 min to achieve phase separation. The supernatant organic layer containing the lipids was transferred to a new vial and the remaining aqueous layer was mixed with 300 μL of MTBE. After sonication and centrifugation under the same conditions, the second organic phase was combined with the first. The combined lipid extract was evaporated under N2 gas using an Evatros mini evaporator (Goojung Engineering, Seoul, Korea), and the dried powder was dissolved in 150 μL of (18:1:1, v/v/v) MeOH:CHCl3:H2O. The dissolved lipid extract was stored at -80°C until nUHPLC-ESI-MS/MS analysis.

Lipid analysis was conducted using a nUHPLC-ESI-MS/MS system (Ultimate 3000 RSLCnano System coupled with a Q Exactive mass spectrometer from Thermo Scientific, San Jose, CA, USA). Mobile phase solutions consisted of H2O/CH3CN (9:1, v/v) for solvent A, and IPA/CH3OH/CH3CN/H2O (7:1.5:1:0.5, v/v/v/v) for solvent B, both containing 0.5 mM NH4HCO2 and 5 mM NH4OH as ionization modifiers. The gradient elution began with 1% B which was increased to 75% over 5 min, and further to 80% in the next 5 min, then to 99%, where it was held for 15 min before returning to 1% B, resulting in a total duration of 32 min. The ﬂow rate of the analytical column was adjusted to 800 nL/min, and the injection volume was 0.3 μL for all experiments.

The MS scan range was set to 40-1100 m/z for the positive ion mode and 400-1700 m/z for the negative ion mode, with ESI voltages of 3.0 (ESI+) and 1.5 kV (ESI-) . The ion transfer tube temperature was maintained at 350°C. Full MS scan mode with data-dependent MS/MS acquisition was used for lipid identification. The molecular structures of lipids were identified using LipidMatch within a tolerance of 5 ppm of precursor ion mass along with retention time. Quantification of lipids was performed by calculating the normalized peak area, which is the peak area of a lipid species relative to that of an internal standard specific to each lipid class. Peak area calculations were performed using the Xcalibur software (Thermo Fisher Scientific).

**HYOU1 protein expression and purification**

Full-length HYOU1 was cloned into pEZT-BM vector as a fusion construct with C-terminal EGFP and FLAG-6xHis tags, separated by a HRV3C protease cleavage site. By fluorescence-based size exclusion chromatography (SEC), HYOU1(1-912) which is truncated form at C-terminus represented a high yield. For HYOU1(1-912) expression, baculovirus was generated following the manufacturer's protocol (Bac-to-Bac expression system, Thermo Fisher Scientific). HEK293F cells (FreeStyle™ 293-F, Thermo Fisher Scientific) were cultured in calcium-free DMEM to a density of 2-2.5 × 10⁶ cells/mL and infected with 10% baculovirus. After 16 hours of incubation at 37°C, 8% CO₂, and 80% humidity, protein expression was enhanced by adding sodium butyrate (10 mM final concentration). The culture temperature was then reduced to 30°C for an additional 48 hours. Cells were harvested by centrifugation (2,000 rpm, 4°C, 10 min) and resuspended in buffer containing 50 mM Tris-HCl pH 8.0 and 150 mM NaCl, supplemented with protease inhibitors (2 µg/mL each of aprotinin, pepstatin, and leupeptin hemisulfate) and bovine DNase I. The suspension was sonicated on ice with three 30-pulse cycles, with 1-minute cooling intervals. After centrifugation (13,000 rpm, 4°C, 30 min), the clarified lysate was incubated with FLAG SM2 resin for 1 hour at 4°C with gentle agitation. The resin was transferred into a gravity-flow column and washed with 5 column volumes (CV) of 20 mM Tris-HCl pH 8.0, 500 mM NaCl, followed by 5 CV of 20 mM Tris-HCl pH 8.0, 150 mM NaCl. The protein was eluted with 5 CV of wash buffer containing FLAG peptide (0.2 mg/mL). The eluted protein was supplemented with 1 mM DTT and HRV3C and incubated overnight at 4°C with gentle rotation to remove the C-terminal GFP-FLAG-10xHis tag. The concentrated sample was subjected to size-exclusion chromatography using a Superdex 200 Increase column (Cytiva, Marlborough, MA) equilibrated with 20 mM Tris-HCl pH 8.0, 150 mM NaCl. Protein purity was confirmed by SDS-PAGE, then was concentrated to 2 mg/mL and stored at -80°C in buffer containing 10% glycerol.

**Supplementary Fig. 1. Upregulated genes in human atherosclerotic plaques.**


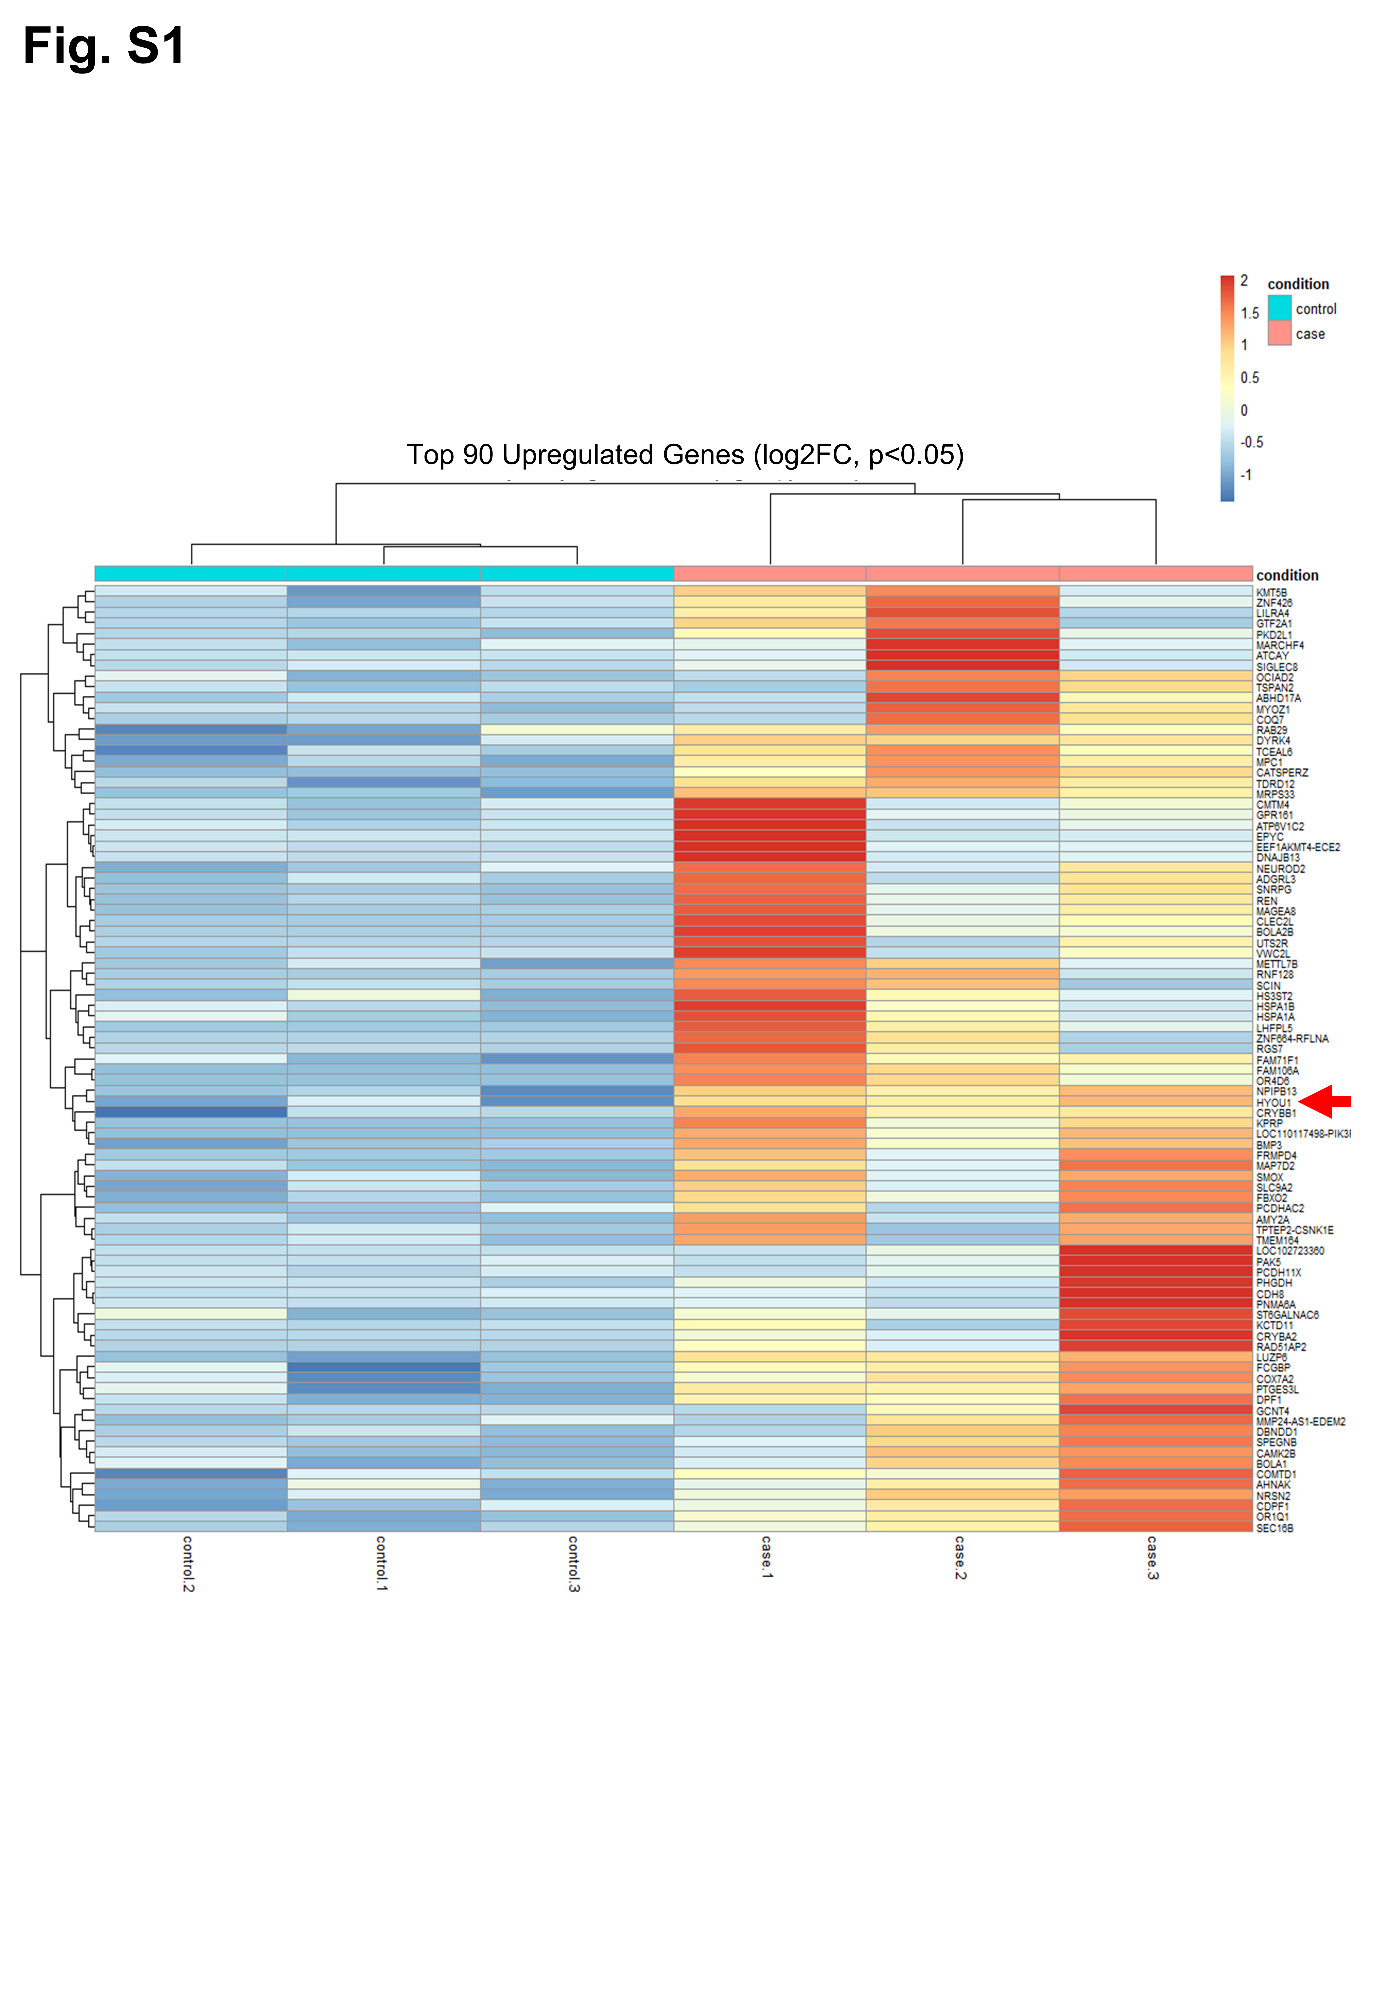


Heatmap of 90 genes significantly upregulated in advanced atherosclerotic plaques (n = 3) compared to healthy intima tissue (n = 3), identified from bulk RNA-seq analysis of human carotid samples (GSE226790). Genes were selected based on log₂ fold change > 0.5 and p < 0.05.

**Supplementary Fig. 2. KEGG pathway enrichment analysis.**

**
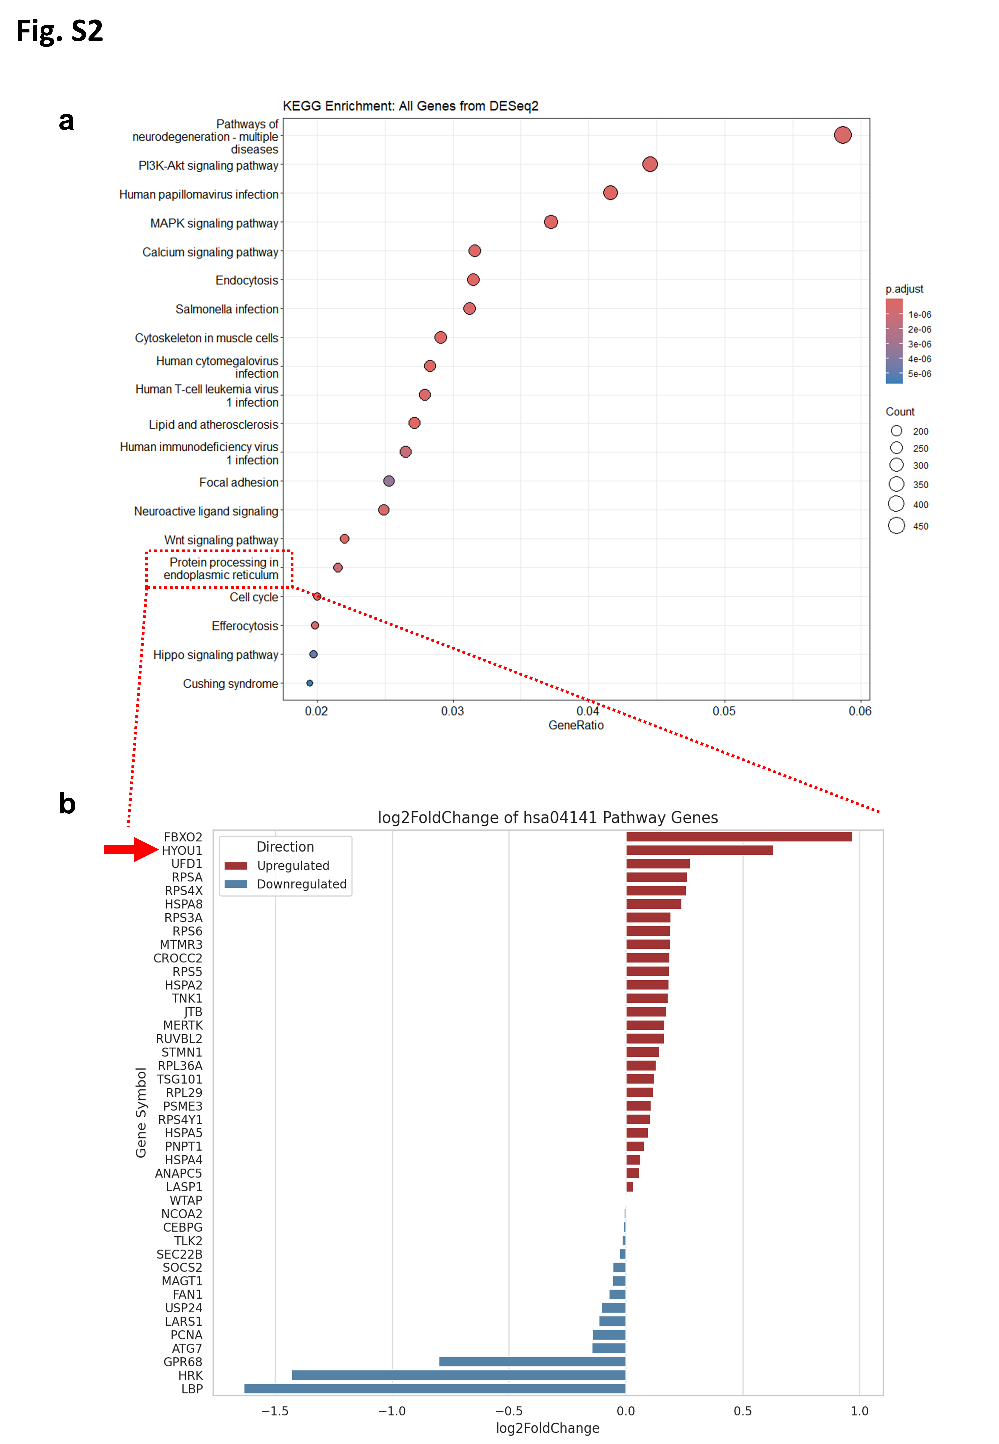
**

(a) KEGG pathway enrichment analysis of all genes from DESeq2, comparing advanced atherosclerotic plaques to healthy intima tissue (GSE226790). Significantly enriched pathways were ranked by gene ratio and –log10(adjusted p-value). Dot size indicates the number of genes per pathway, and color represents statistical significance. (b) Bar plot showing log2 fold change values of genes within the “Protein processing in endoplasmic reticulum” pathway (KEGG: hsa04141). Genes upregulated in plaques are shown in red, and downregulated genes are shown in blue.

**Supplementary Fig. 3. Co-regulation of MAM and autophagy genes in plaque-associated monocytes.**


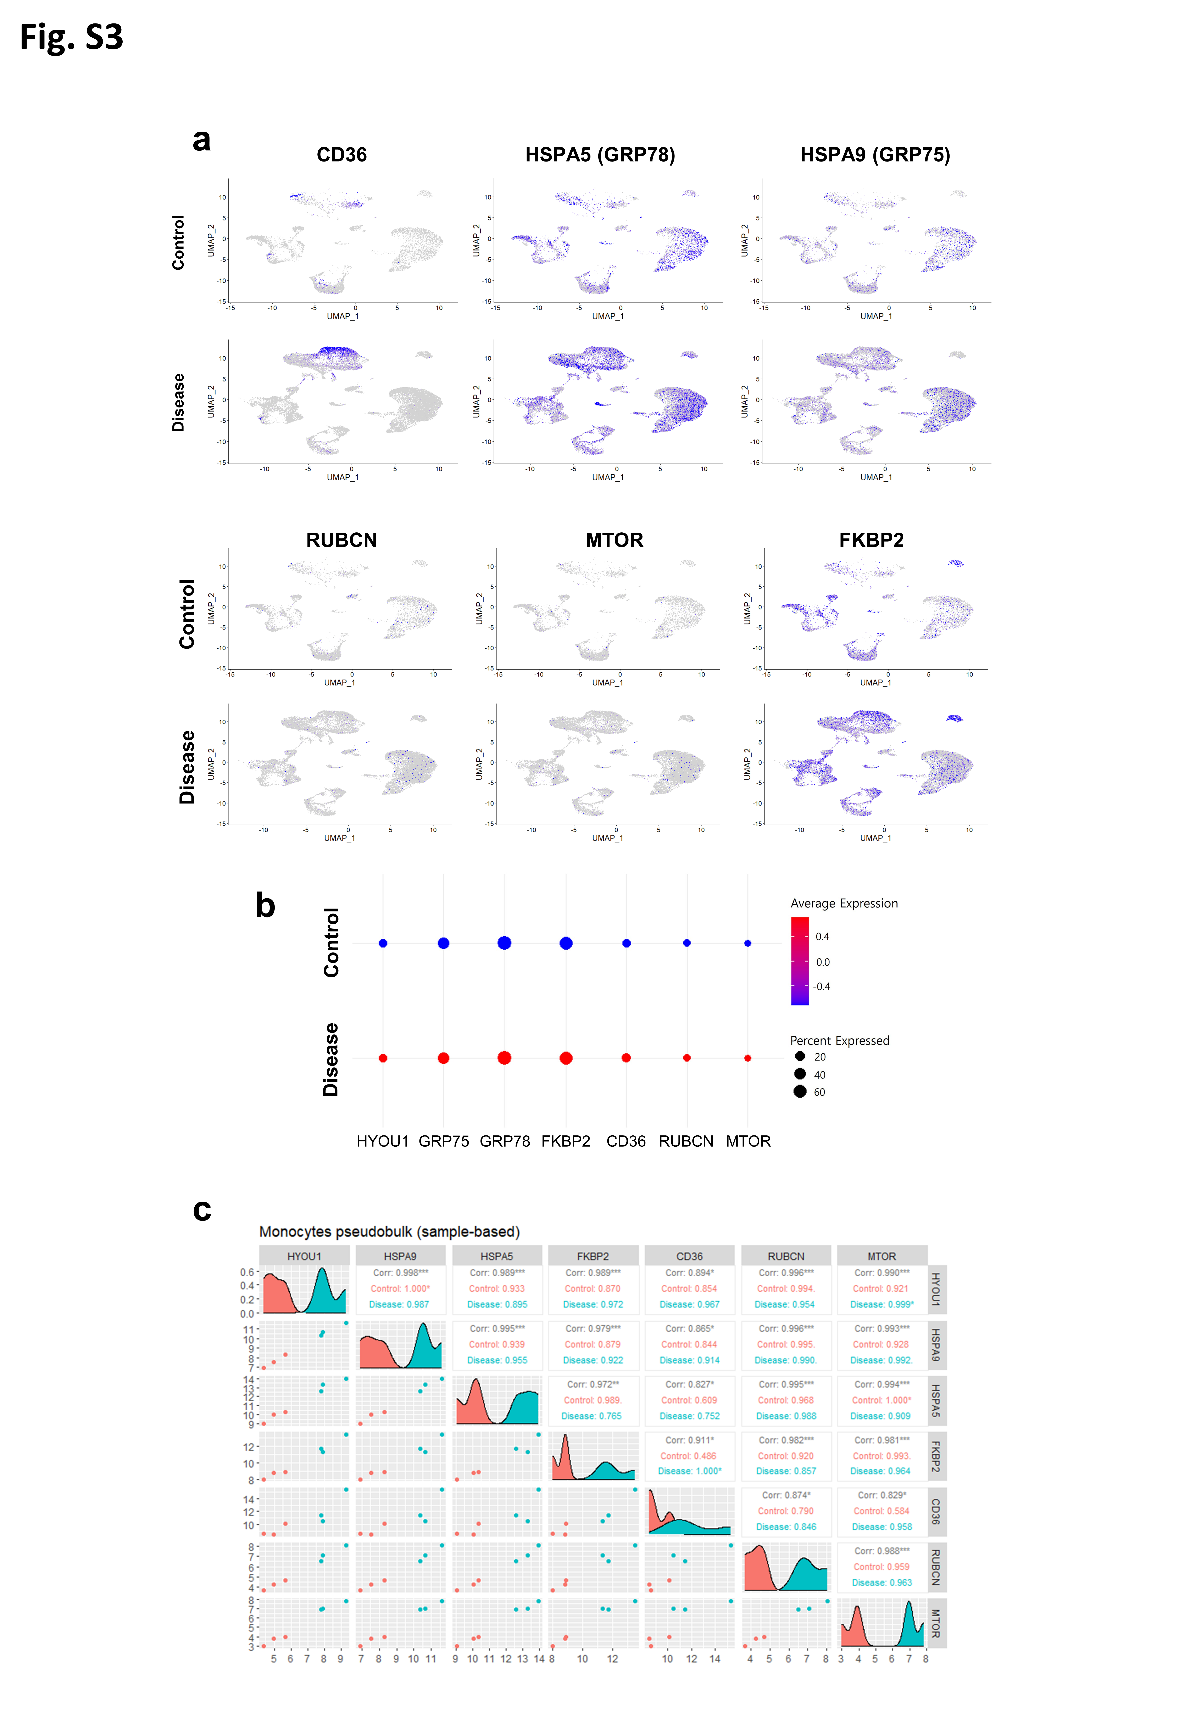


(a) FeaturePlot visualization of the gene expression patterns of selected genes (CD36, GRP78, GRP75, RUBCN, MTOR, and FKBP2) in AC-Disease and PA-Control tissues. (b) Dot plot visualization of gene expression in AC-Disease and PA-Control using Pseudobulk analysis. (c) Pairwise correlation analysis of MAM-, autophagy-, and protein folding–related genes using pseudobulk RNA expression profiles from monocytes in AC-Disease and PA-Control.

**Supplementary Fig. 4. Inflammatory gene expression in plaque-associated monocytes.**

**
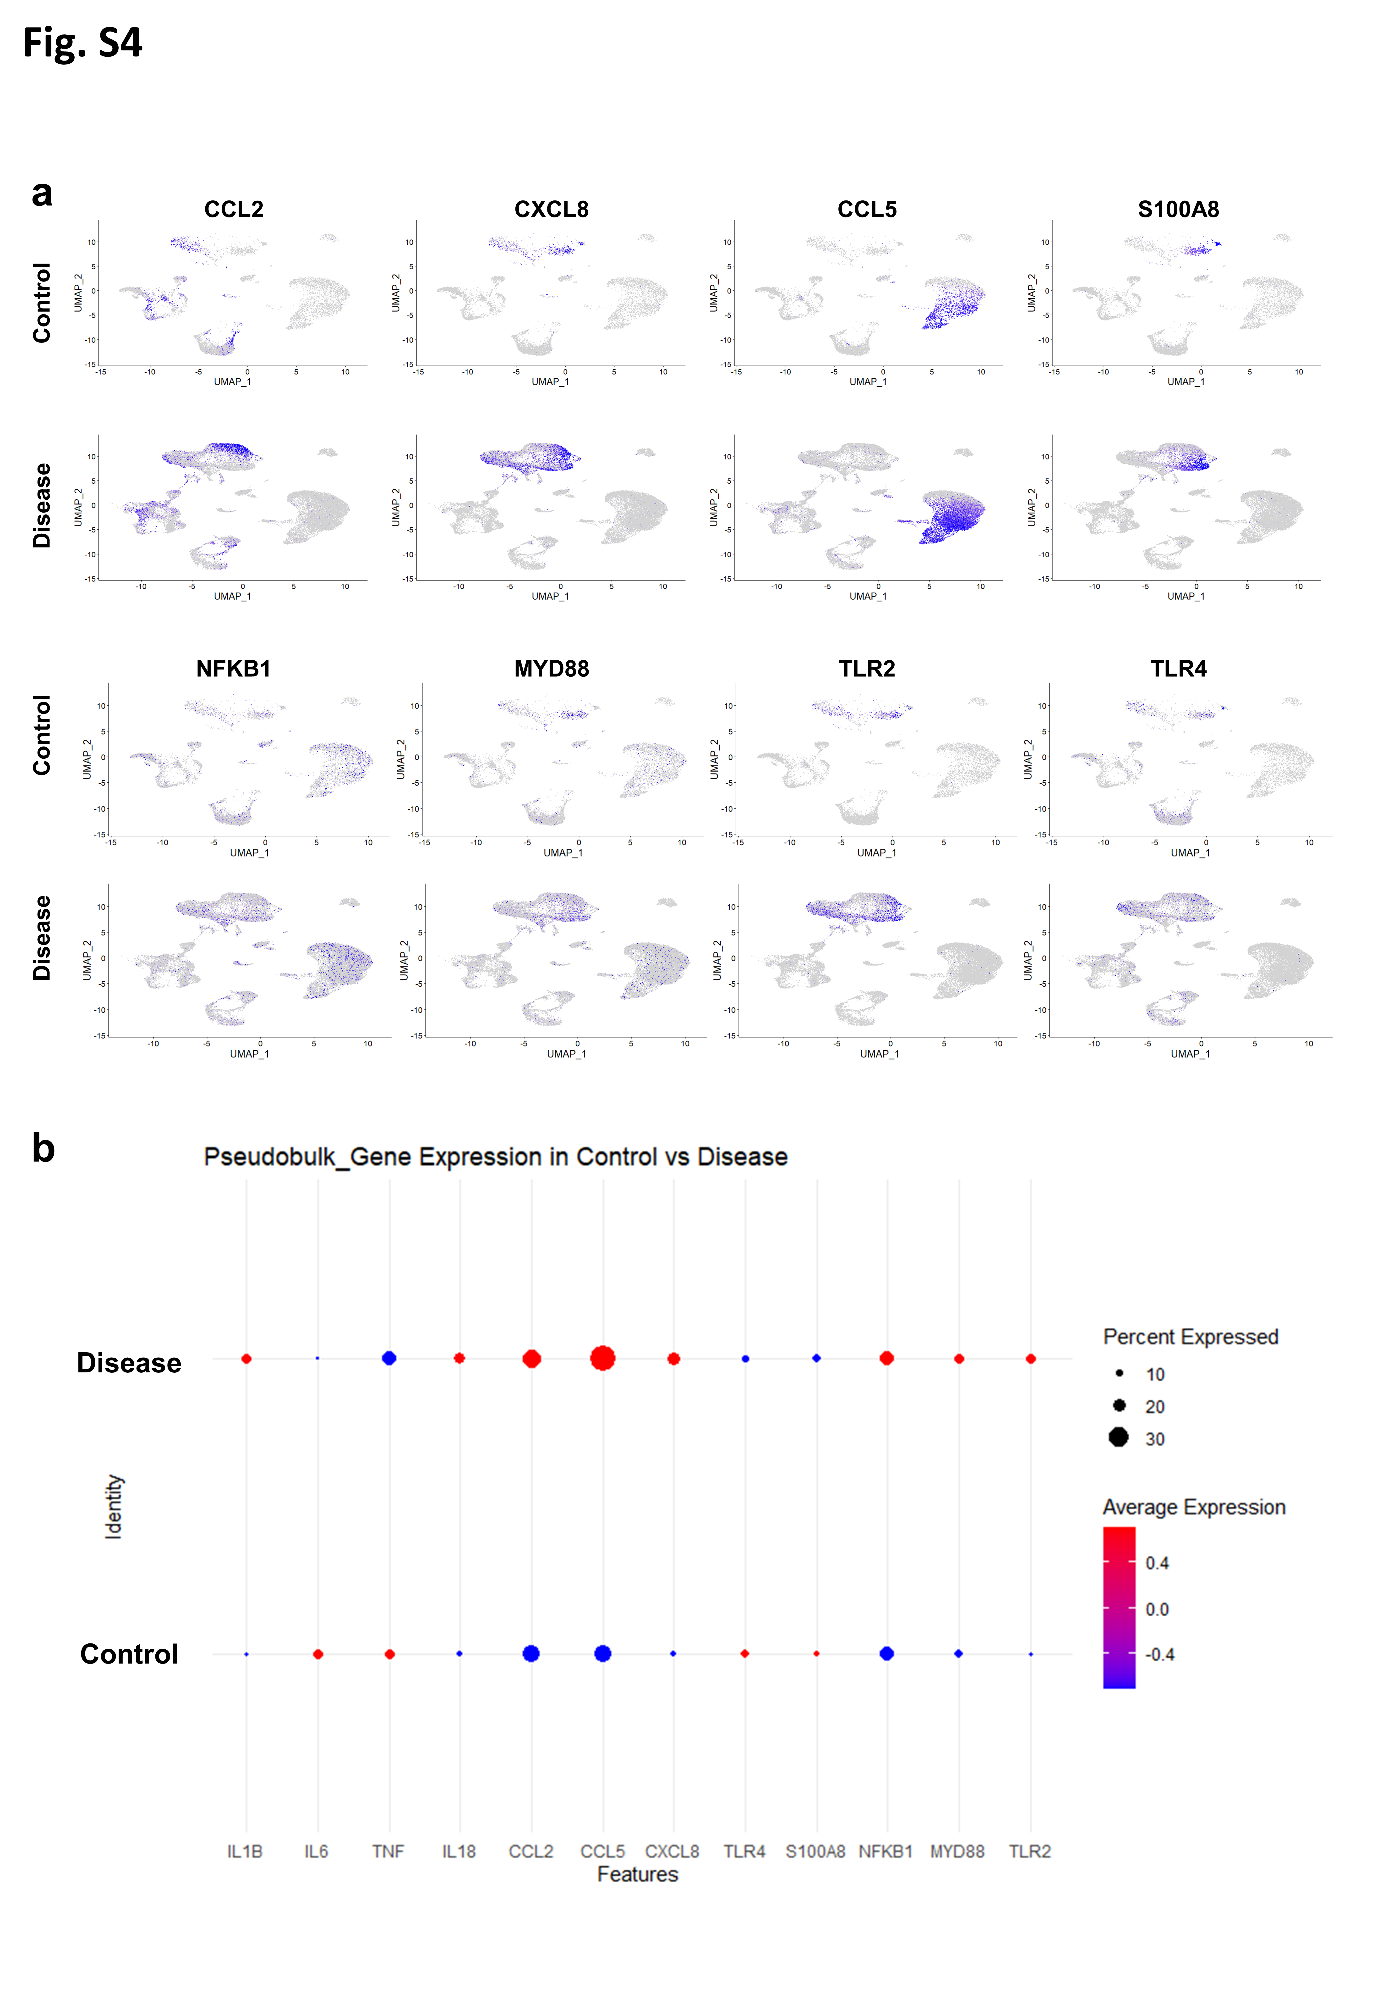
**

(a) FeaturePlot visualization of inflammation-related genes (CCL2, CXCL8, CCL5, S100A8, NFKB1, MYD88, TLR2, and TLR4) in single-cell RNA-seq data from AC–Disease and PA–Control tissues. (b) Dot plot showing pseudobulk expression levels of the genes in (a).

**Supplementary Fig. 5. Generation and validation of HYOU1 knockout cells and transcriptomic analysis.**


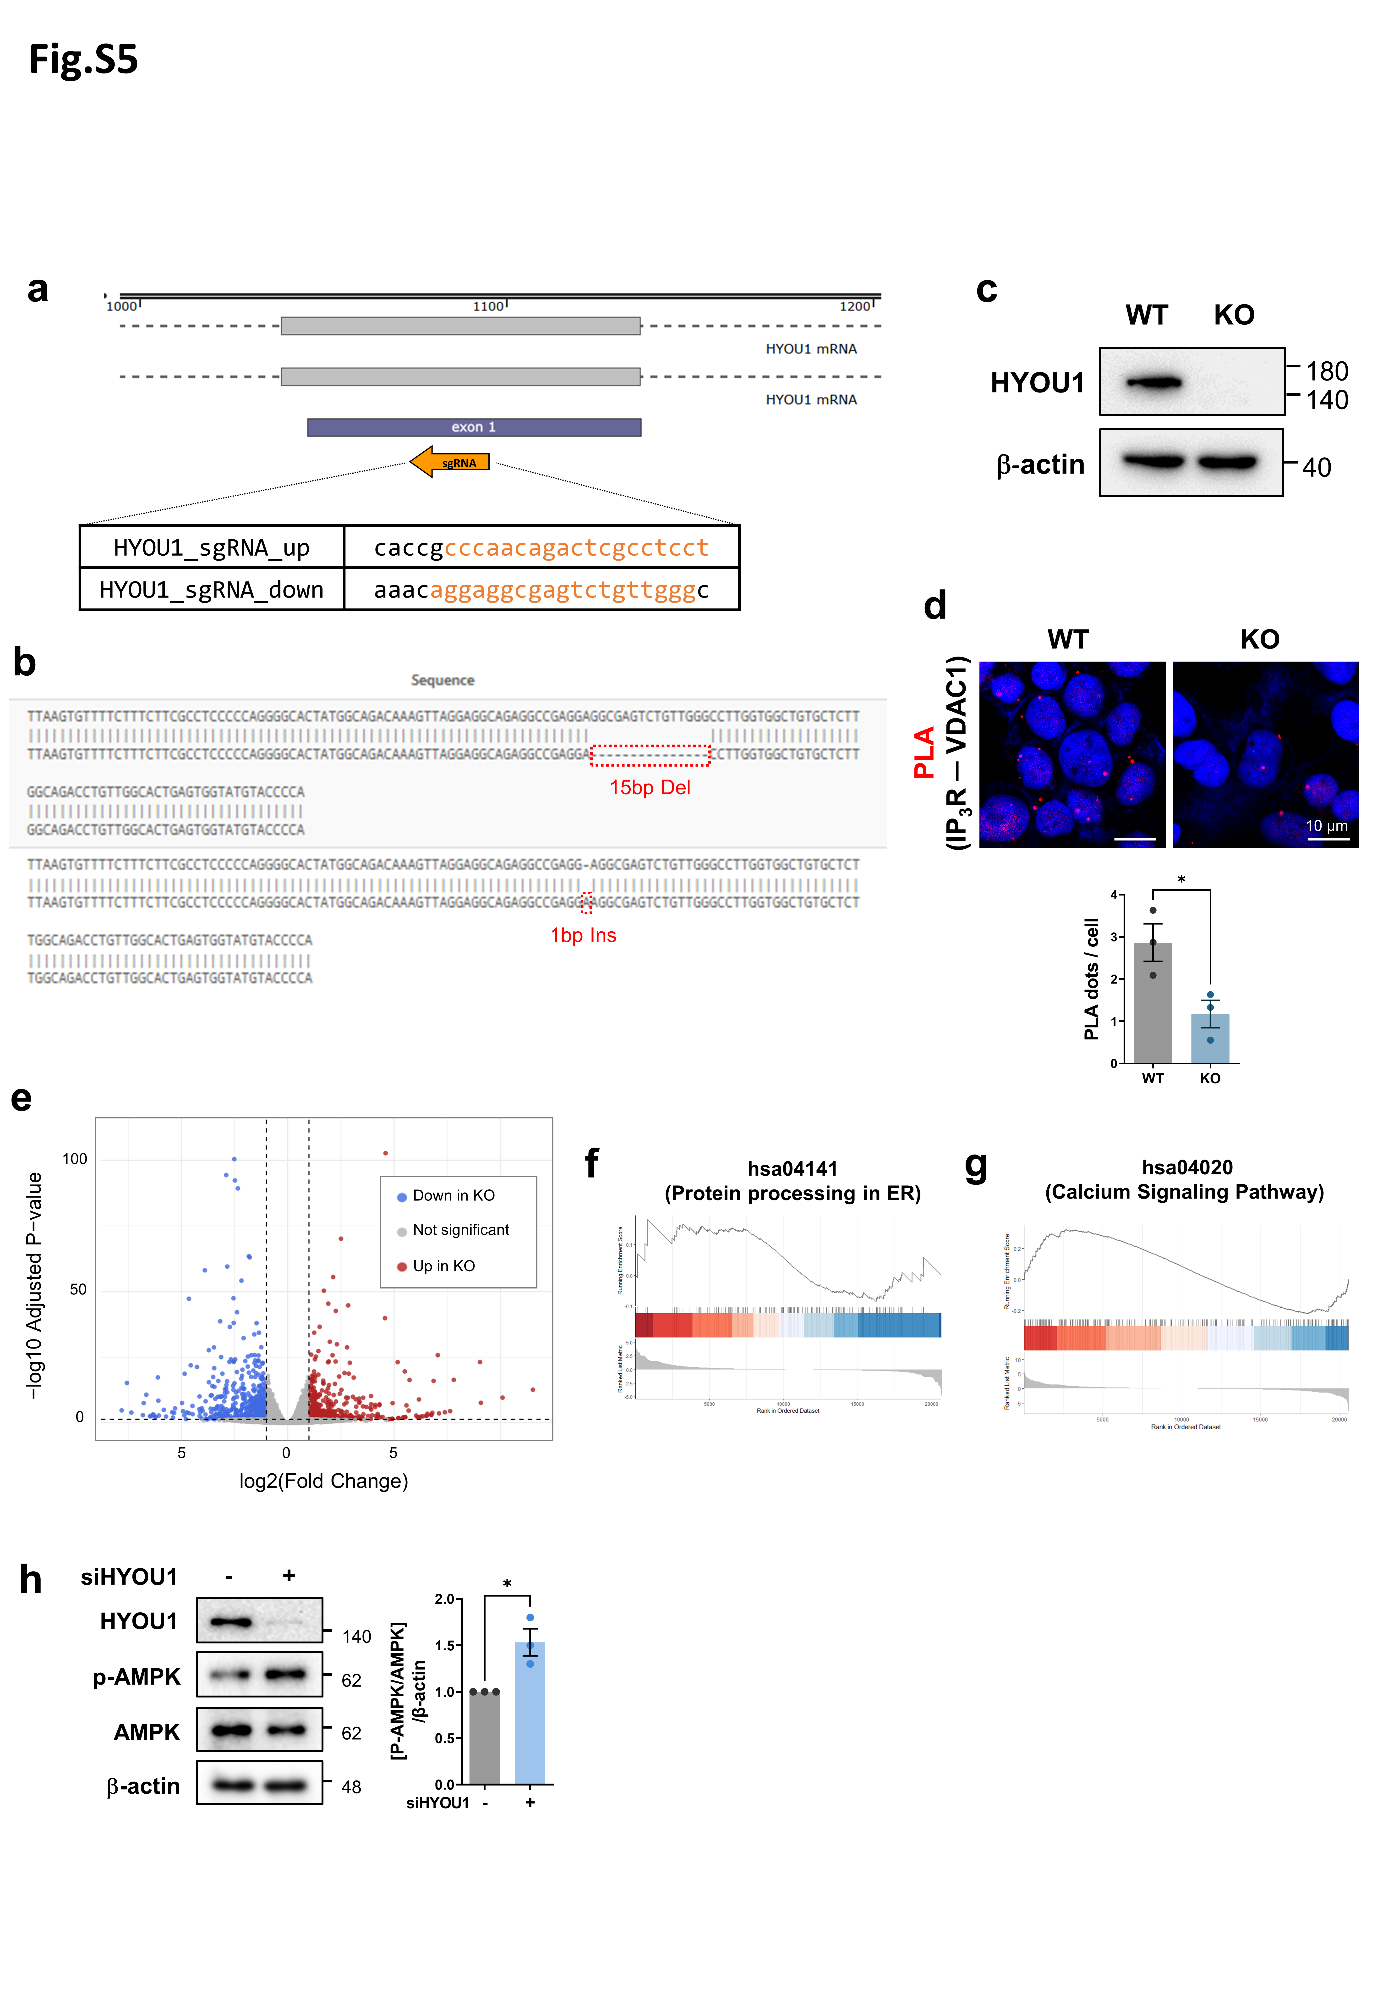


(a) Sequences of sgRNAs used for CRISPR–Cas9-mediated targeting of HYOU1. (b) Next-generation sequencing (NGS) analysis confirming HYOU1 knockout. A 15 bp deletion was detected in one allele, and a 1 bp insertion in the other, indicating a heterozygous knockout. (c) Immunoblot analysis of HYOU1 expression in CRISPR–Cas9-edited heterozygous knockout (KO) 293T cells. (d) Representative PLA images showing IP3R–VDAC1 interactions in WT and HYOU1 KO 293T cells. Scale bar, 10 µm. (e) Volcano plot showing differentially expressed genes (DEGs) in HYOU1 knockout (KO) 293T cells compared to wild-type (WT) 293T cells, based on bulk RNA-seq analysis (n = 2). (f-g) Gene Set Enrichment Analysis (GSEA) reveals significant enrichment of pathways related to protein processing in the ER (hsa04141) (I) and calcium signaling (hsa04020). (h) Western blot analysis of phospho-AMPK (Thr172) and total AMPK in HUVECs transfected with 20 nM siHYOU1 for 24 hours. Quantitative data are presented as mean ± S.E.M. Statistical significance was determined using an unpaired two-tailed Student’s t-test. *p < 0.05.

**Supplementary Fig. 6. Screening of small molecules regulating MAM integrity.**


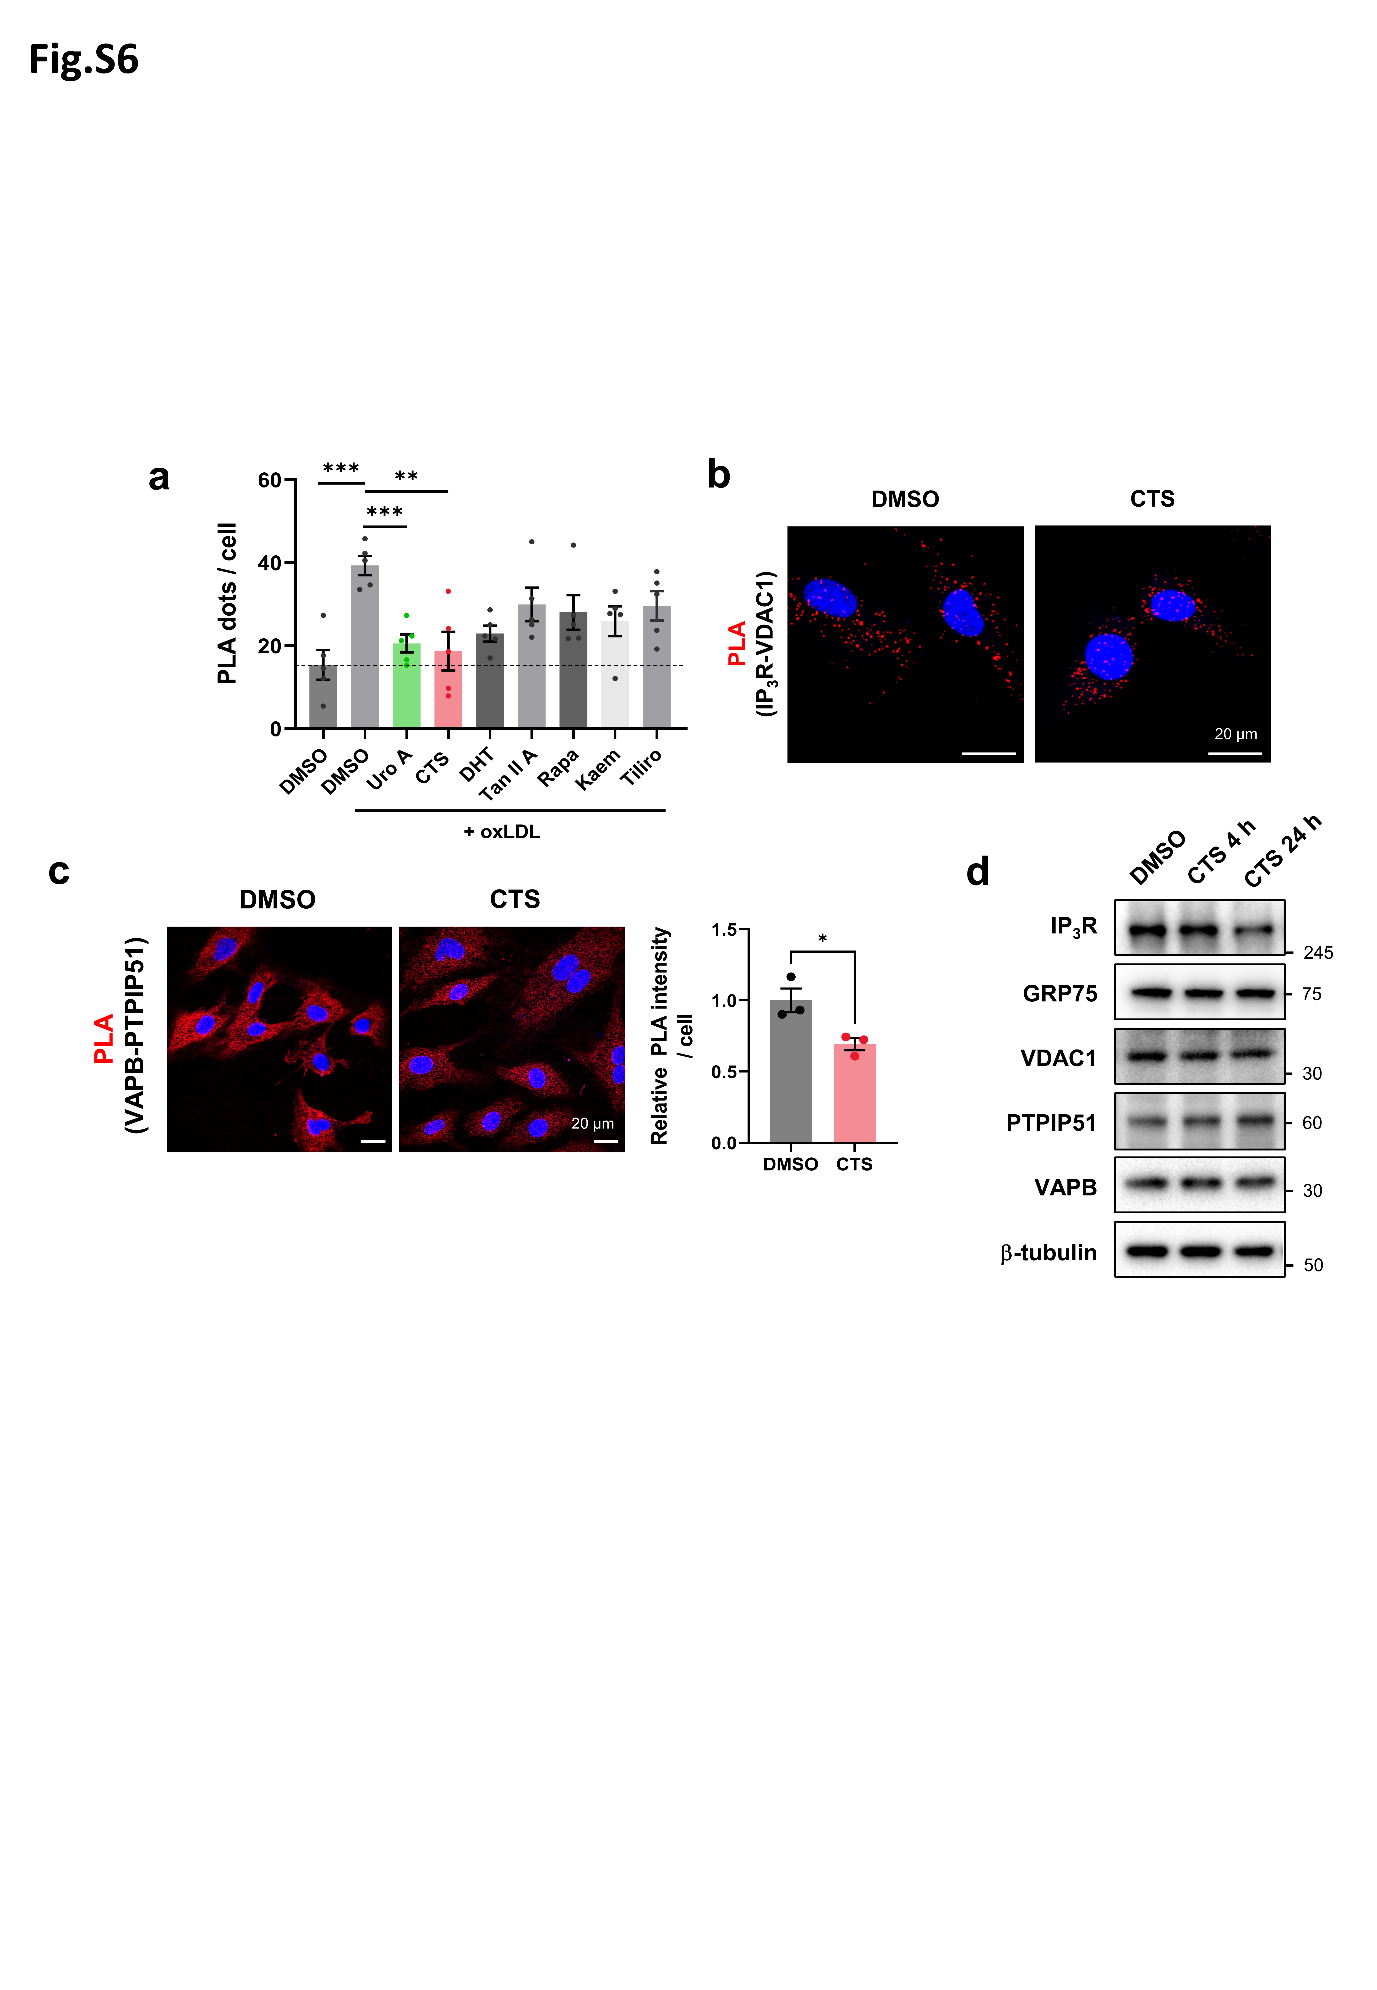


(a) PLA detecting ER–mitochondria interactions between IP3R and VDAC1 in HUVECs pretreated with 50 µg/mL oxLDL and subsequently treated with natural compounds, including Urolithin A (Uro A), cryptotanshinone (CTS), dihydrotanshinone (DHT), tanshinone IIA (Tan II A), rapamycin (Rapa), kaemferide (Kaem), and tiliroside (Tiliro). All compounds were administered at 5 µM for 4 hours. (b) Representative image from (a) showing PLA signals for IP3R–VDAC1 interactions. Scale bar, 20 µm. (c) PLA detecting VAPB–PTPIP51 interactions in HUVECs treated with 5 µM CTS for 4 hours. Scale bar, 20 µm. (d) Immunoblot analysis of MAM–related proteins in HUVECs following treatment with 5 µM CTS for 4 or 24 hours. Quantitative data are presented as mean ± S.E.M. Statistical significance was determined using an unpaired two-tailed Student’s t-test. *p < 0.05; **p < 0.01; ***p < 0.001.

**Supplementary Fig. 7. Identification and validation of CTS target proteins by DARTS-LC-MS/MS.**


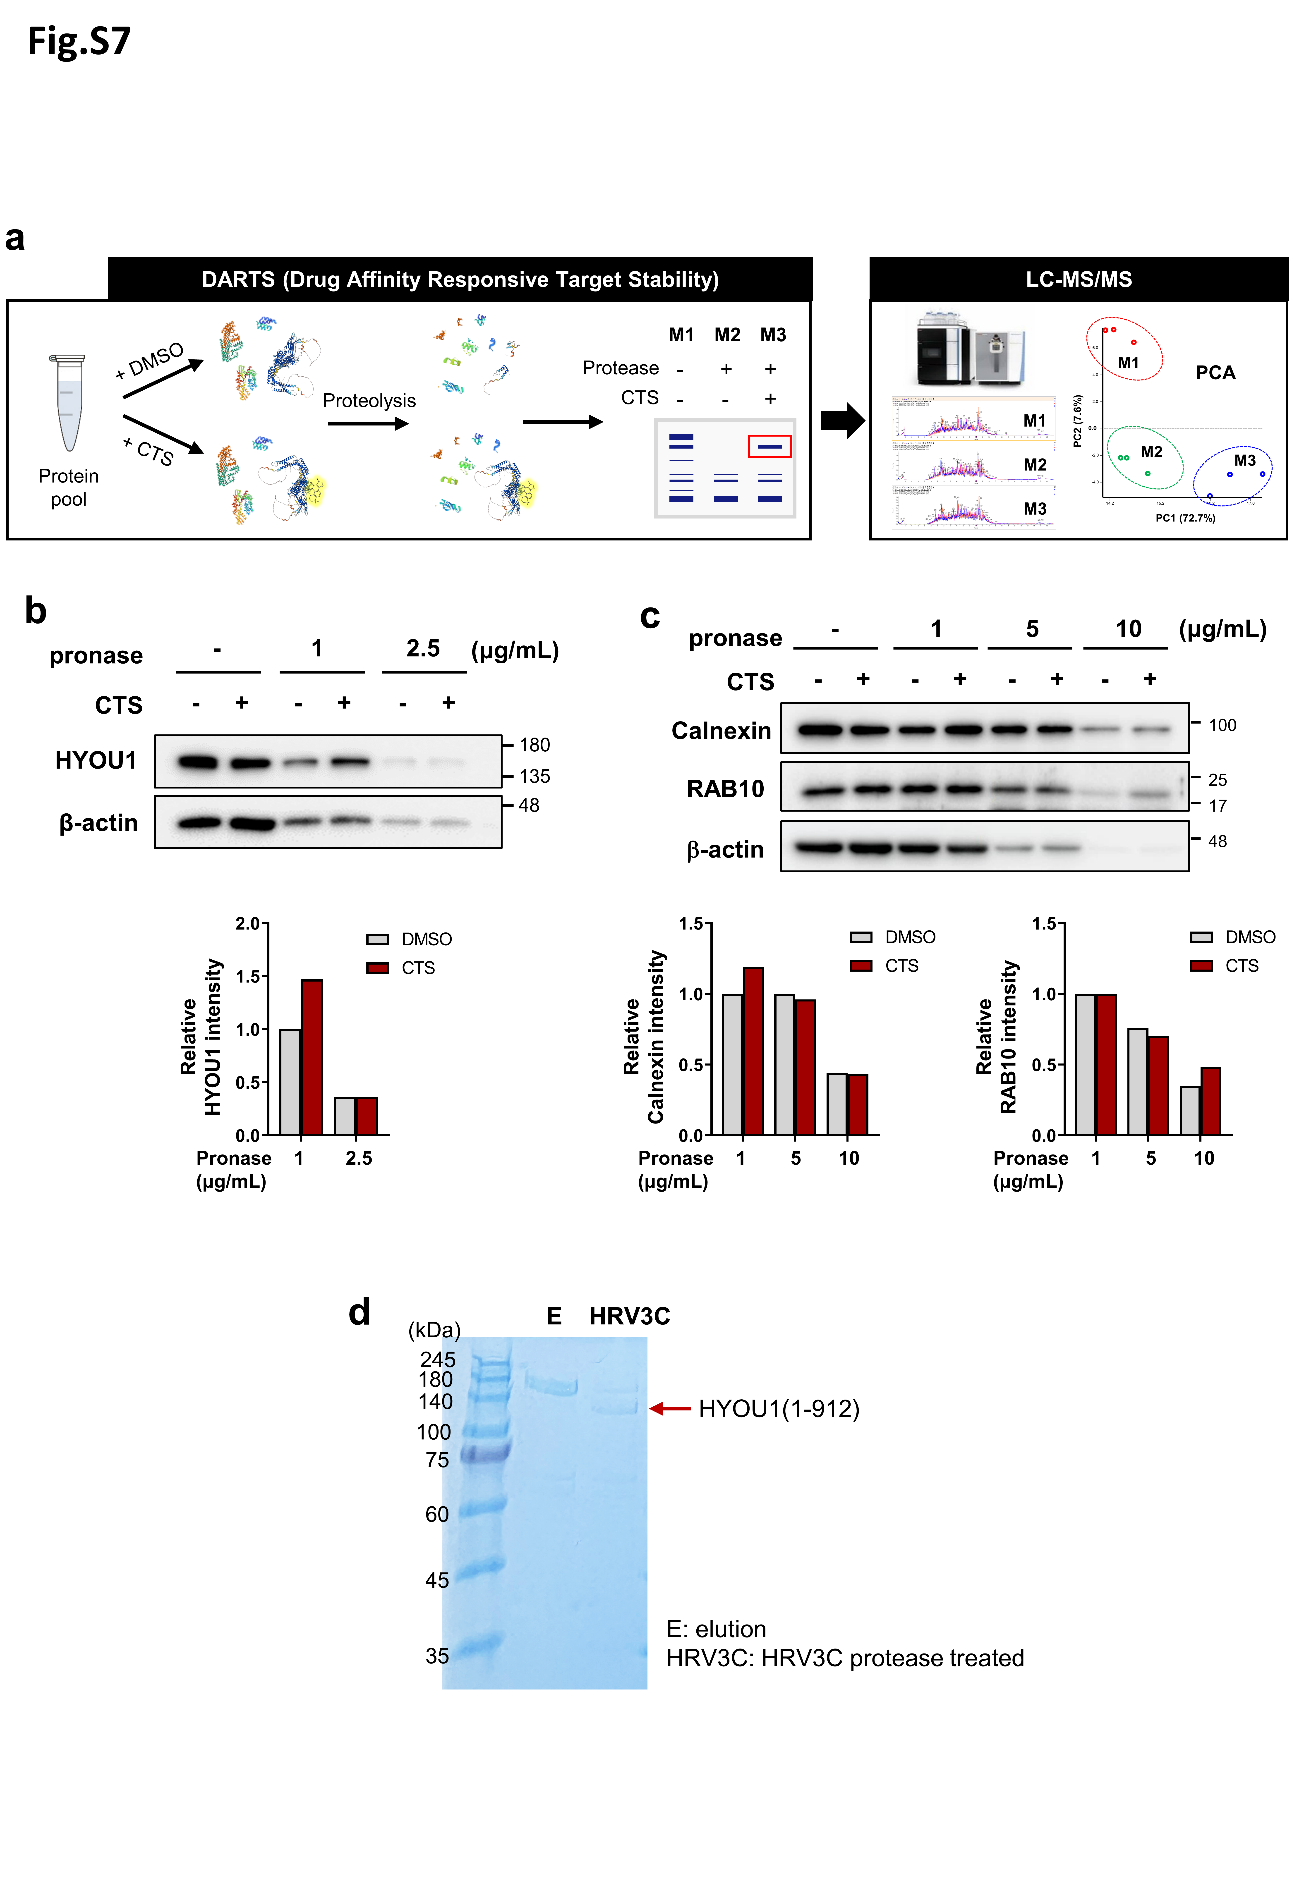


(a) Schematic overview of the DARTS-LC-MS/MS workflow. Membrane protein fractions isolated from HepG2 cell lysates were incubated with DMSO or CTS for 3 hours, followed by proteolytic digestion with pronase under three conditions: M1 (no treatment), M2 (DMSO + pronase), and M3 (CTS + pronase). Samples underwent in-gel digestion and SWATH-MS analysis in triplicate. Principal component analysis (PCA) revealed clear separation among the groups, indicating compound-dependent proteome stabilization. (b) DARTS assay was performed to assess the proteolysis of HYOU1 by pronase, which is inhibited by CTS. The optimal pronase concentration is 1 μg/mL for HYOU1 degradation was determined in HUVECs. (c) Immunoblot validation of proteolytic sensitivity of candidate target proteins CANX (Calnexin) and RAB10 by DARTS analysis. (d) SDS-PAGE result of HYOU1(1-912) purification by flag tag. Each fraction from HYOU1(1-912) purification procedure was conformed.

**Supplementary Fig. 8. Functional validation of HYOU1 as a direct CTS target via binding site mutagenesis.**


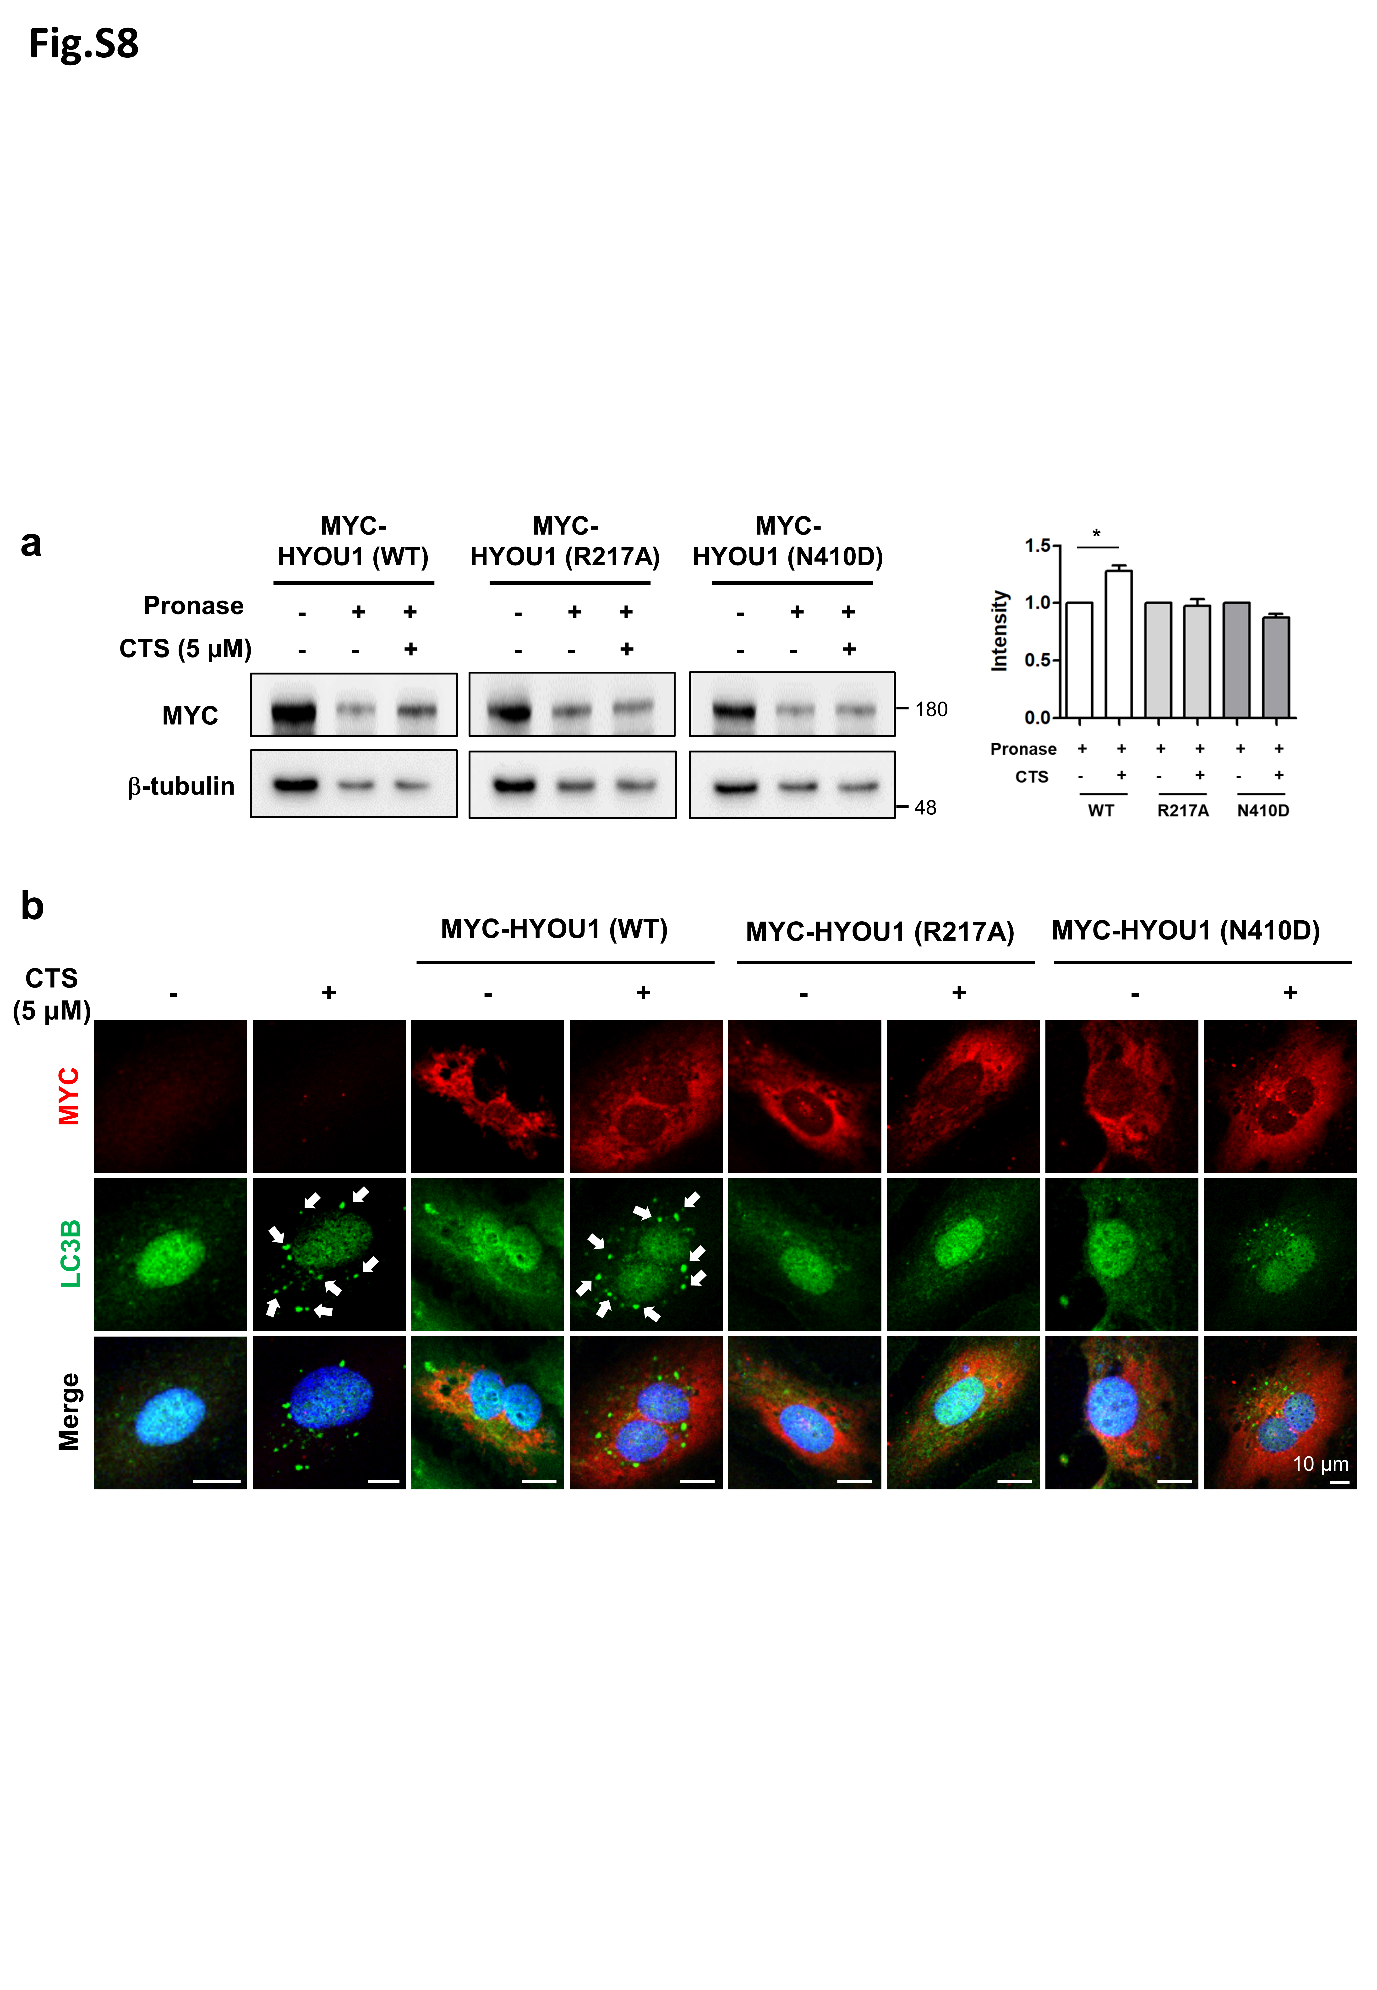


(a) DARTS assay was performed using membrane protein fractions from HEK293 cells transfected with MYC-tagged HYOU1 wild-type (WT), R217A, or N410D mutants for 48 hours. Ectopic expression of HYOU1 was confirmed by anti-MYC immunoblotting. (b) LC3B immunofluorescence staining of autophagosomes in HUVECs transfected with HYOU1 wild-type (WT), R217A, or N410D mutants, and treated with 5 µM CTS. Transfection efficiency was confirmed by MYC staining. Quantitative data are presented as mean ± S.E.M. Statistical significance was determined using an unpaired two-tailed Student’s t-test. *p < 0.05.

**Supplementary Fig. 9. CTS disrupts MAM structure and alters mitochondrial lipids.**


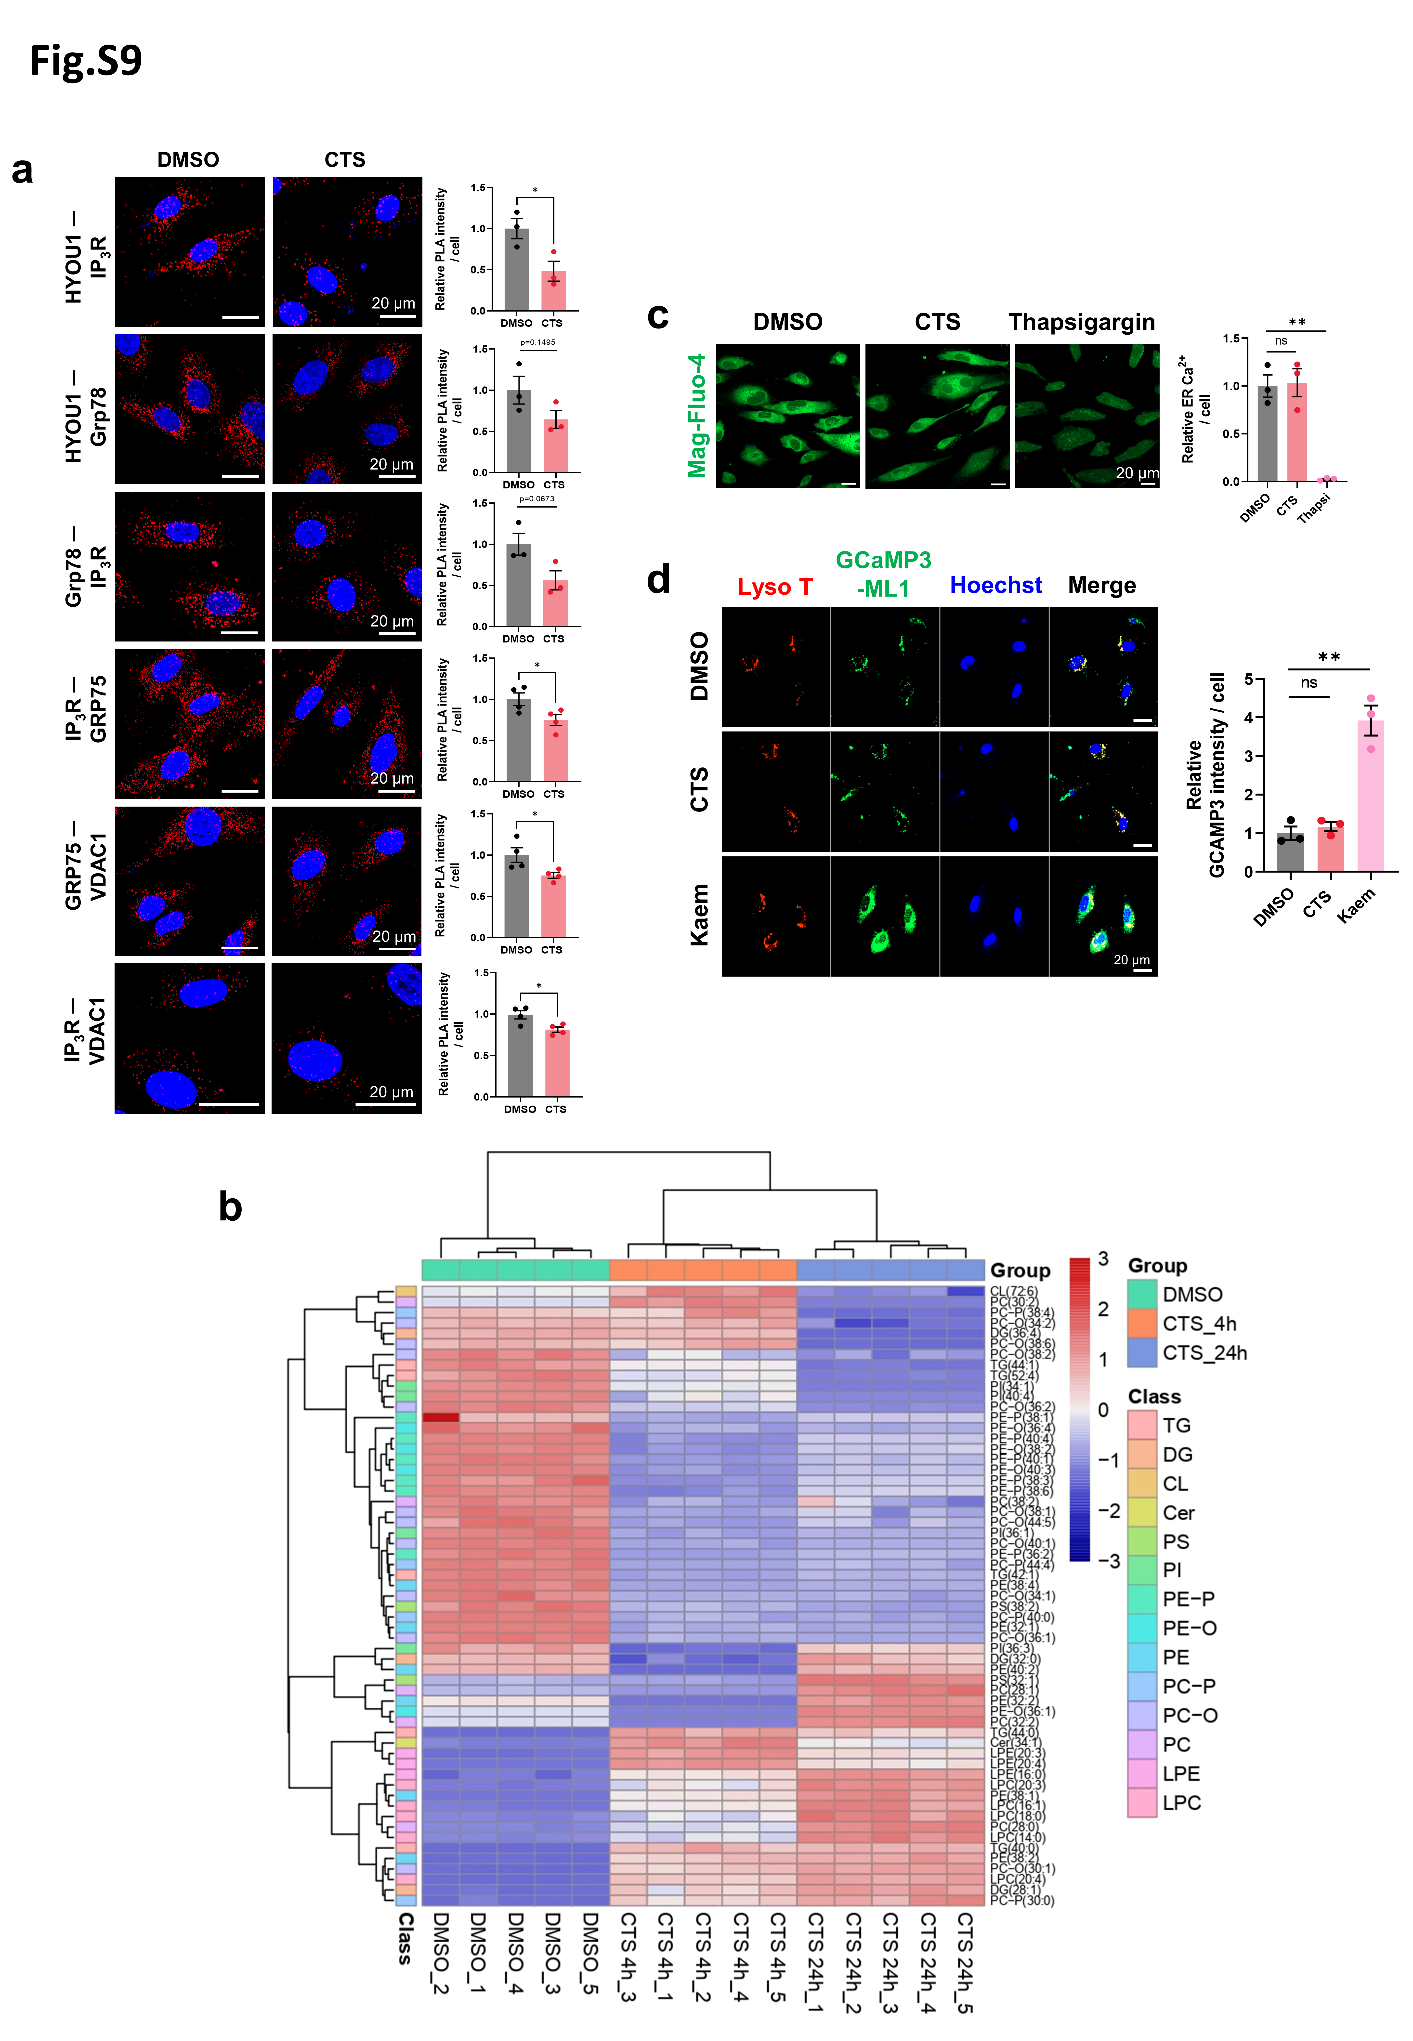


(a) PLA showing protein–protein interactions involved in MAM formation in HUVECs treated with 5 µM CTS for 4 hours. (b) Mitochondria were isolated from HUVECs treated with DMSO, 5 µM CTS for 4 hours, or 5 µM CTS for 24 hours, followed by lipidomics profiling. A heatmap illustrates temporal changes in the abundance of mitochondrial lipid species, including triacylglycerol (TG), diacylglycerol (DG), cardiolipin (CL), ceramide (Cer), phosphatidylserine (PS), phosphatidylinositol (PI), plasmenyl-phosphatidylethanolamine (PE-P), plasmanyl-phosphatidylethanolamine (PE-O), phosphatidylethanolamine (PE), plasmenyl-phosphatidylcholine (PC-P), plasmanyl-phosphatidylcholine (PC-O), phosphatidylcholine (PC), lysophosphatidylethanolamine (LPE), and lysophosphatidylcholine (LPC). (c) ER calcium levels in HUVECs following treatment with CTS (4 h) or Thapsigargin (1 h). Cells were loaded with 2 μM Mag-Fluo-4 AM to monitor ER calcium content via fluorescence intensity. Scale bar, 20 µm. (d) Lysosomal calcium release in HUVECs transfected with GCaMP3-ML1, a genetically encoded calcium indicator targeted to lysosomes. Fluorescence intensity reflects lysosome-derived calcium signaling activity. Scale bar, 20 µm. Quantitative data are presented as mean ± S.E.M. Statistical significance was determined using an unpaired two-tailed Student’s t-test. *p < 0.05; **p < 0.01; ns, not significant.

**Supplementary Fig. 10. CTS induces autophagy flux.**

**
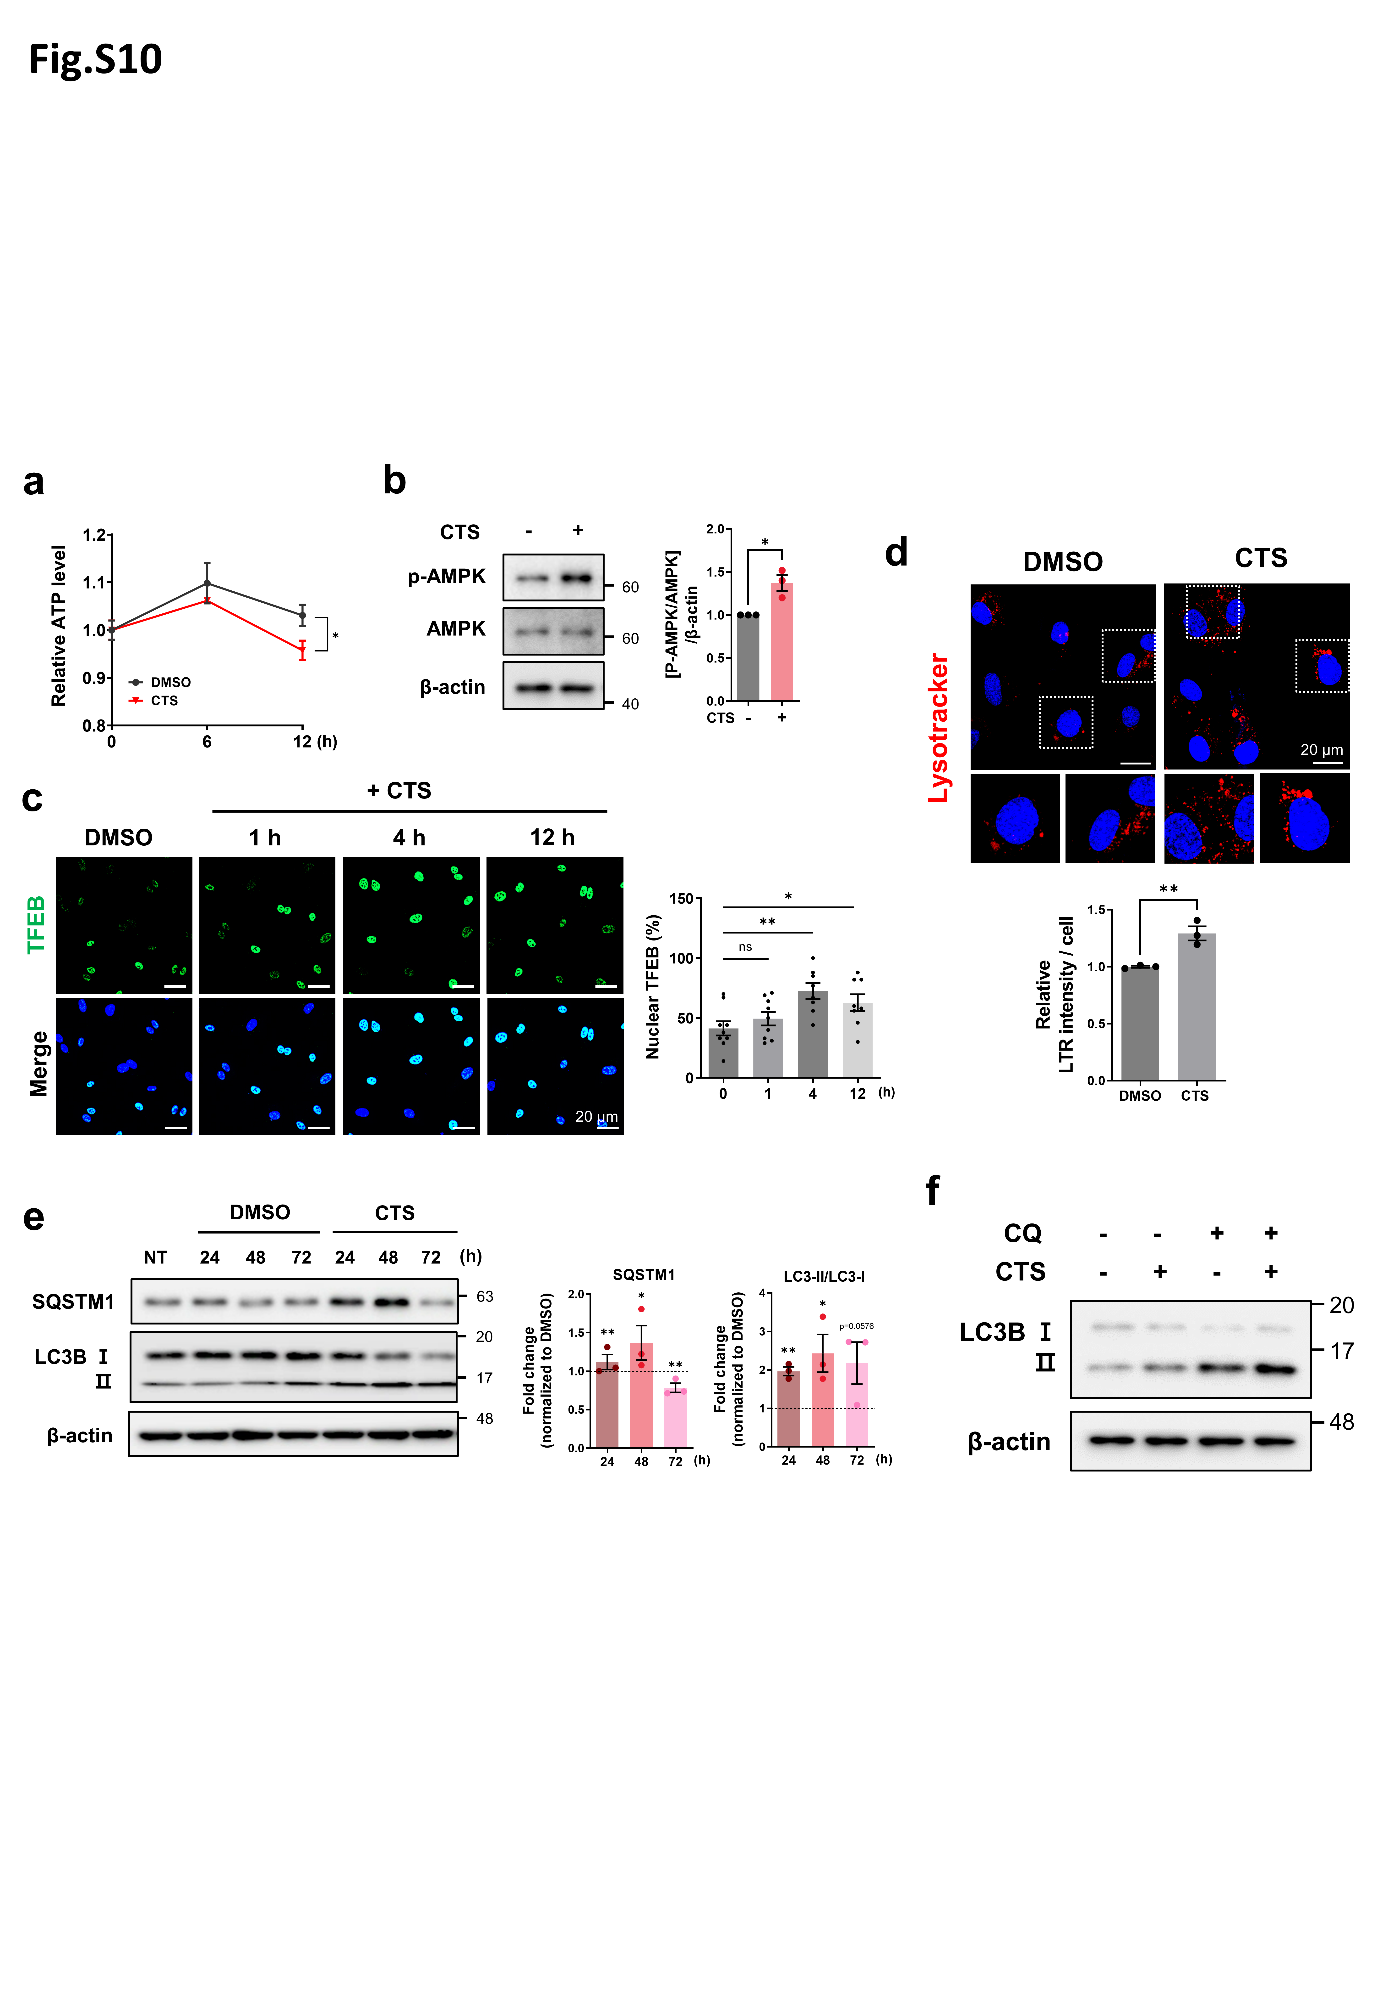
**

(a) Quantification of intracellular ATP levels in HUVECs following treatment with 5 µM CTS. (b) Immunoblot analysis of AMPK phosphorylation in HUVECs treated with 5 µM CTS for 6 hours. (c) Immunocytochemistry of TFEB in HUVECs treated with CTS. The percentage of TFEB co-localizing with the nucleus was quantified. (d) HUVECs were treated with 5 μM CTS for 48 hours, and stained with 200 nM LysoTracker Red to visualize lysosomes. Scale bar: 20 μm. (e) Immunoblot analysis of autophagy markers SQSTM1/p62 and LC3 in HUVECs treated with 5 µM CTS for 24, 48, and 72 hours. Data are normalized to the control (set as 1) and presented as mean ± S.E.M. . Statistical analysis was performed using a one-sample t-test. (f) Western blot analysis of LC3-II levels in HUVECs treated with 5 µM CTS, with or without 20 μM chloroquine (CQ). Co-treatment with CTS and CQ for 24 hours increased LC3-II accumulation. All quantitative data (excluding (e) are presented as mean ± S.E.M. Statistical

significance was determined using unpaired two-tailed Student’s t test. *p < 0.05, **p < 0.01.

**Supplementary Fig. 11. OxLDL impairs ER–mitochondria communication and autophagic flux.**

**
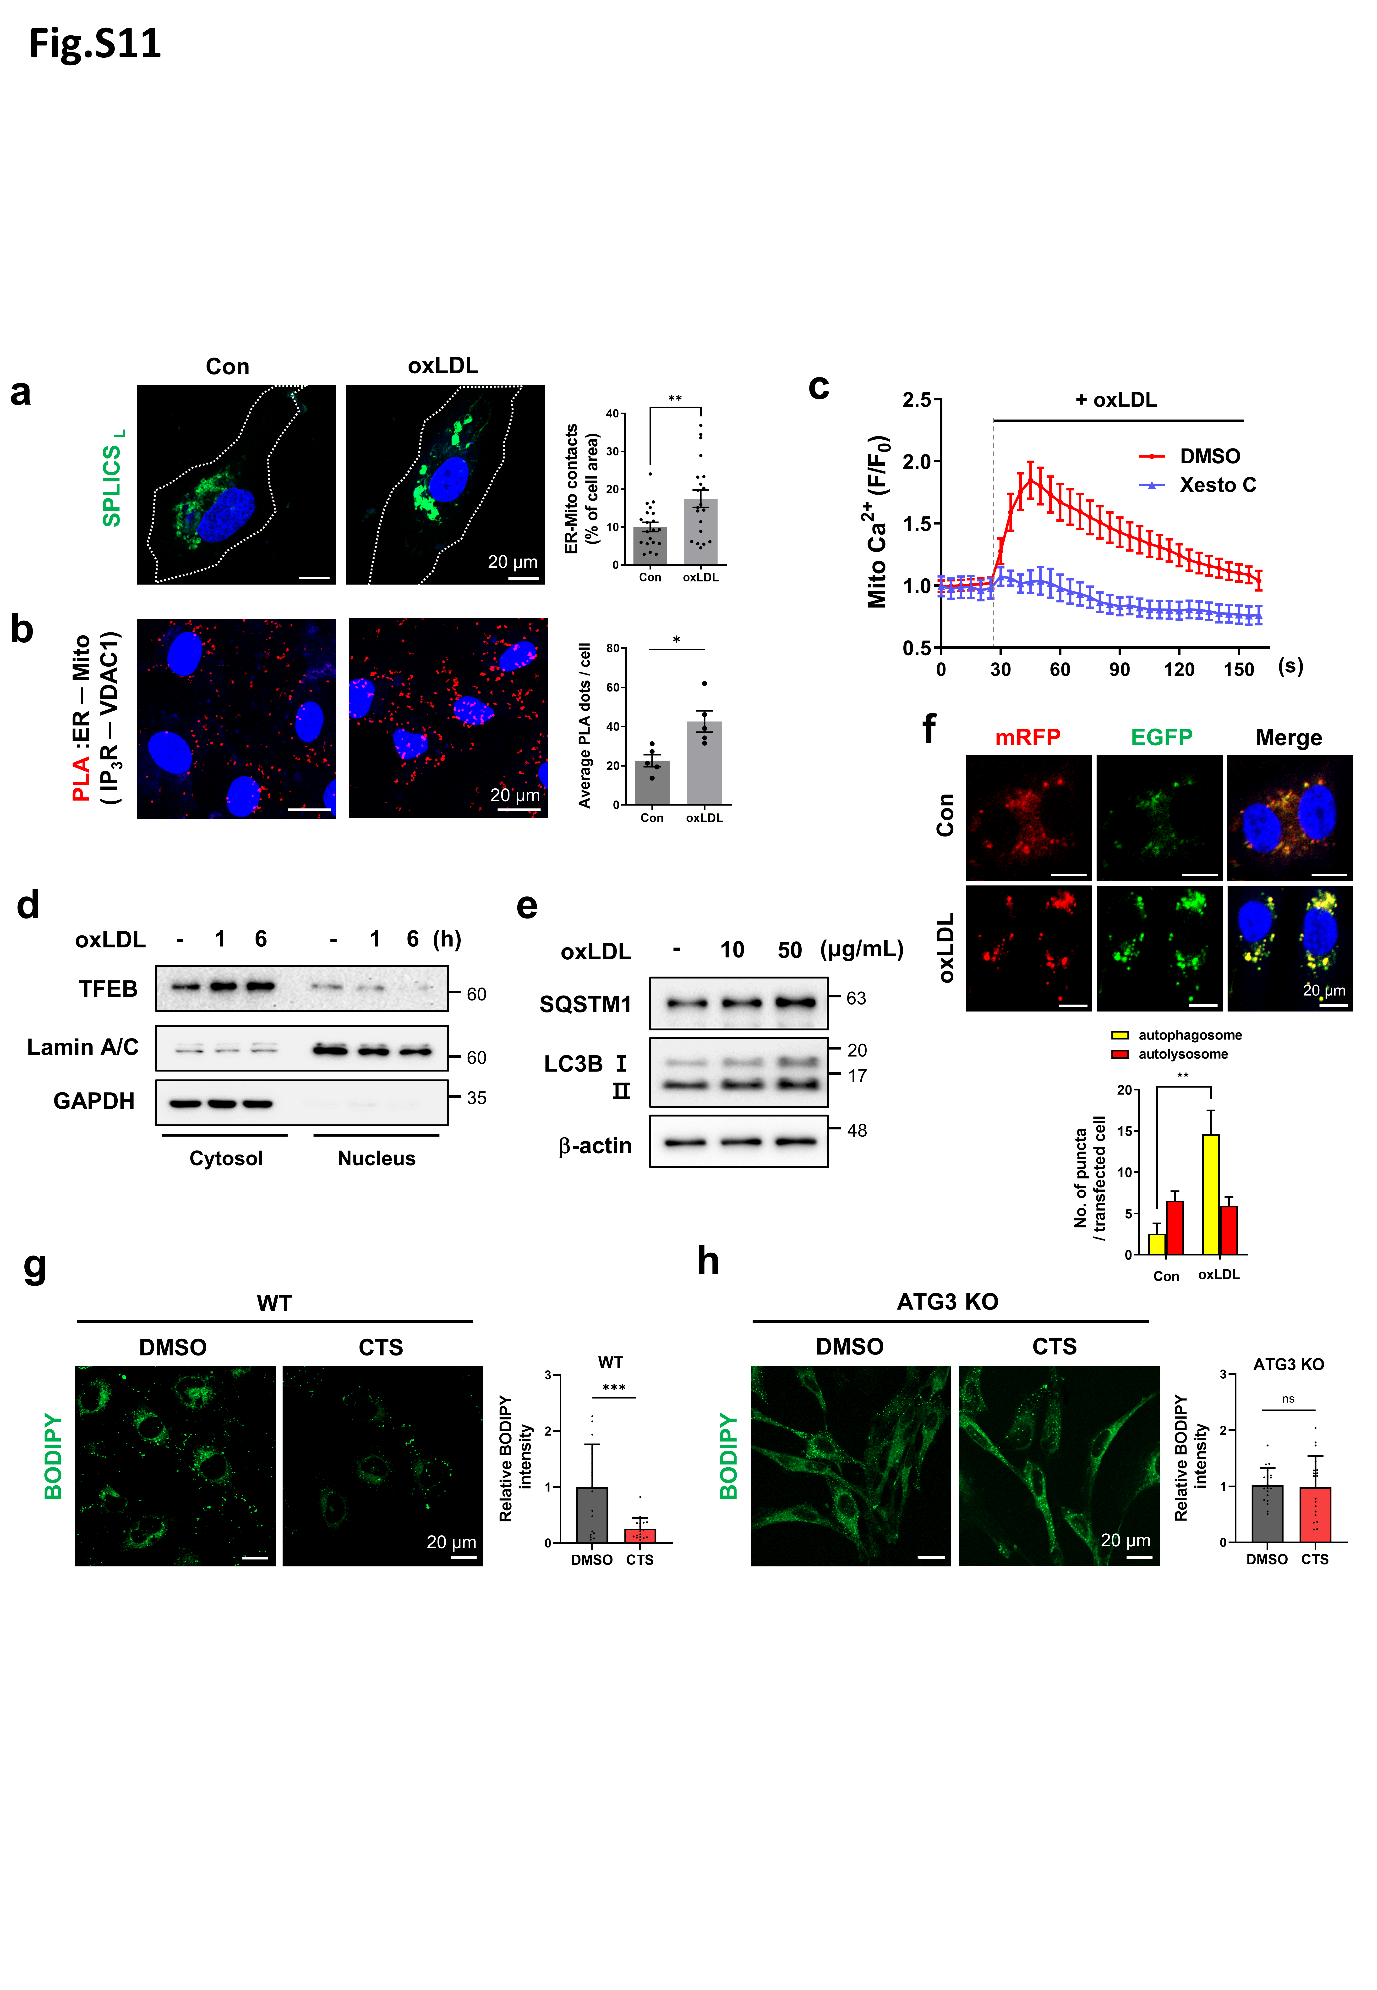
**

(a) GFP fluorescence reconstitution in HeLa cells expressing the split-GFP-based ER-mitochondria contact site sensors (SPLICS), treated with 50 µg/mL oxLDL for 24 hours. Scale bar, 20 µm. (b) Representative images of PLA for IP3R (ER) and VDAC1 (mitochondria), along with an analysis evaluating organelle interactions in HUVECs treated with or without 50 μg/mL oxLDL for 24 hours. (c) Real-time mitochondrial calcium levels were measured in HUVECs treated with or without xestospongin C (Xesto C) following oxLDL treatment. (d) Western blot analysis of TFEB nuclear translocation in HUVECs treated with 50 μg/mL oxLDL for 1 and 6 hours. Lamin A/C and GAPDH were used as nuclear and cytoplasmic markers, respectively. (e) Western blot analysis of autophagy markers in cells treated with oxLDL for 48 hours. (f) Representative images of cells transfected with the tandem-LC3 vector and treated with 50 μg/mL oxLDL for 48 hours. Yellow puncta represent autophagosomes, and red puncta represent autolysosomes. Scale bar: 20 μm. (g-h) Intracellular lipid levels in wild-type and ATG3-knockout HeLa cells treated with 5 µM CTS for 24 hours, assessed by BODIPY staining. Quantitative data are presented as mean ± S.E.M. Statistical significance was determined using an unpaired two-tailed Student’s t-test. *p < 0.05; **p < 0.01; ***p < 0.001; ns, not significant.
