# Supplementary material for: ER Chaperone HYOU1 Couples MAM Remodeling to Autophagic Lipid Clearance in Atherosclerosis
Source: Research Square preprint supplement (doi:10.21203/rs.3.rs-7276074/v1), 2025-08-27
Supplement: Supplementary file 2 [file e0e4595dd2d2d317ba8b87c3.xlsx]

## Sheet: Fig.1-4
Fig. 1g				Fig. 2a			Fig. 2b			Fig. 2p
Normal	Initial	Severe		si-	siHYOU1		si-	siHYOU1		si-	siHYOU1
1.12561	0.916625	0.52873		8.3	6.8		0.884804	0.273947		0.88436	1.17761
0.933946	1.32543	0.798461		10.3	3		1.24602	0.530219		0.876614	1.25721
1.54977	1.61974	0.402056		12.8	2.9		0.869181	0.41092		1.13129	1.20029
0.859265	0.813735	1.82162
1.92388	2.2456	1.57069		Fig. 2q (left)			Fig. 2q (right)
0.408152	0.777132	0.960283		si-	siHYOU1		si-	siHYOU1
1.36228	0.488519	1.4694		1	0.775975		1	2.0087
0.957705	1.81782	2.21402		1	0.743096		1	1.58852
0.905112	1.38856	2.01248		1	0.8		1	1.63
0.990272	0.811306	0.799634
0.401458	2.05673	1.30219		Fig. 3a			Fig. 3b
1.00635	0.730731	1.69436		si-	siHYOU1		si-	siHYOU1
1.29394	1.13272	1.82429		1.02084	0.317134		0.940925	0.435049
0.989071	0.294455	1.46901		1.08915	0.267818		0.965411	0.23924
0.761134	2.06265	2.0188		0.890007	0.442839		1.09366	0.266695
0.626782	2.2	1.83771
0.905271	0.557478
	1.24905			Fig. 4e				Fig. 4f
				1e-05	5.998	5.01			DMSO		CTS
				0.01	2.372	5.15		40	100	100	100	100
				0.1	3.656	5.237		45	101.955	90.4035	110.049	91.3192
				0.5	13.58	10.589		50	69.0922	60.2486	81.3344	56.0266
				1	15.239	21.727		55	18.5684	22.2067	32.2982	27.0924
				5	26.622	29.766		60	12.2207	7.248	24.7776	13.7476
				10	24.916	34.432		62	11.6061	9.26945	24.0115	12.9816
				50 (uM)	30	38.291		64 (ºC)	10.7891	3.3983	30.2059	9.70058

## Sheet: Fig.5
Fig. 5e			Fig. 5f			Fig. 5g			Fig. 5k
DMSO	CTS		DMSO	CTS		DMSO	CTS			DMSO																												CTS
26.6	56.4		0.27	0.417		0.652	0.451		0	1.21741	1.37217	1.03872	1.3467	0.547053	1.28861	0.851357	1.18403	1.43025	0.586804	1.05879	0.575226	0.72458	0.833026	0.833026	1.11224	0.778736	0.628058	1.37757	1.00387	0.866397	1.348	1.73895	0.955466	0.663616	0.997008	0.726457	1.35399	0.90304	0.773486	0.765291	1.24201	1.35203	0.7836	0.624229	1.0441	1.12466	1.46363	0.967207	1.22788
61.2	67.2		0.111	0.447		0.568	0.683		5	1.2149	1.36271	1.02406	1.30424	0.53837	1.26237	0.850971	1.17997	1.41192	0.57677	1.04606	0.576577	0.716668	0.818361	0.818361	1.10916	0.728217	0.612216	1.35962	0.904242	0.830488	1.32653	1.68474	0.946312	0.653406	0.977469	0.716423	1.32987	0.903563	0.745588	0.749424	1.23835	1.33808	0.780287	0.624055	1.04271	1.08752	1.45194	0.97174	1.22736
37	52.4		0.41	1.821		0.368	0.098		10	1.21548	1.35055	1.01499	1.2973	0.537405	1.25195	0.84499	1.17303	1.41288	0.578892	1.0285	0.56963	0.726896	0.813729	0.813729	1.09835	0.645661	0.556768	1.30488	0.817286	0.797395	1.29238	1.6476	0.939975	0.602535	0.94772	0.656046	1.27161	0.903912	0.769302	0.759712	1.24637	1.33686	0.774184	0.618824	1.02649	1.09083	1.45996	0.972263	1.23486
56.2	28.8		0.143	0.424		0.471	0.364		15	1.49952	1.22108	1.15238	1.37506	0.726896	1.26874	1.12189	2.42517	2.44929	0.660516	0.8118	0.582173	2.37172	1.79611	1.79611	1.3712	1.14522	0.578771	1.35346	1.39535	0.774688	1.05492	1.25489	0.927478	0.59391	0.458898	0.702341	1.21405	0.823878	0.604526	0.515948	0.728849	1.39283	0.881593	0.656487	1.48403	1.09014	0.896937	0.798769	0.811149
29.2	58.2		0.23	0.565		0.78	0.3		20	2.50795	1.84532	3.33808	1.66046	1.08388	1.86345	2.08054	3.53877	3.76897	1.32721	1.33666	1.20641	2.83406	2.2461	2.2461	1.65853	1.46524	0.855307	1.50607	1.85038	0.989262	1.64795	2.06847	0.533357	0.670481	0.708502	0.813413	1.0044	1.16093	1.10234	0.530769	1.35046	1.69083	1.05805	0.756399	2.43275	2.57695	1.66118	1.05299	2.13075
42.8	37		0.694	0.863		0.29	0.273		25	2.84371	1.96939	3.66304	1.73455	1.07655	2.14788	2.39198	3.55826	3.77611	1.4289	1.35885	1.54448	2.84834	2.05603	2.05603	1.64328	2.38286	1.6388	2.47509	2.60342	1.35205	2.7379	3.20225	1.08308	1.11723	1.30769	1.3737	1.56733	1.57173	1.57069	0.653174	1.68193	2.13145	1.25386	0.871654	2.96404	3.18165	2.04339	1.22876	2.54225
60	32.8		0.181	0.47		0.735	0.745		30	2.92263	2.03847	3.76319	1.73513	0.988555	2.21272	2.51548	3.4612	3.56983	1.28514	1.31216	1.481	2.87497	1.92636	1.92636	1.63576	2.68826	2.28551	3.36015	2.7254	1.40697	3.84915	3.62243	1.63721	1.53054	1.64196	1.84122	2.14945	1.94697	1.88751	0.780635	1.94575	2.44583	1.39841	0.949596	3.17712	3.55776	2.26048	1.37784	2.65193
18	62.8		0.173	0.465		0.392	0.589		35	2.86513	2.04291	3.86584	1.70117	0.956523	2.06838	2.55041	3.31165	3.38845	1.16936	1.23574	1.38432	2.84371	1.92848	1.92848	1.61781	2.511	2.45203	3.46506	2.66925	1.40222	4.36085	3.8891	1.90671	1.64619	1.84052	1.8539	2.33286	1.96754	1.96545	0.857531	1.92761	2.48436	1.37017	0.902168	2.98514	3.69167	2.19056	1.30827	2.44949
36.8	42.8		0.214	0.478		0.549	0.559		40	2.71944	1.91633	3.8724	1.66084	0.958452	1.8623	2.44408	3.20533	3.25704	1.1026	1.13019	1.29479	2.75649	1.93755	1.93755	1.52036	2.24221	2.3855	3.22619	2.47597	1.33709	4.29889	3.70322	2.06759	1.63475	1.76342	1.69512	2.23658	1.8556	1.86205	0.851951	1.81218	2.46902	1.26502	0.831725	2.68105	3.43291	2.01671	1.30548	2.28367
50.2	77.2		0.426	1.61		0.52	0.178		45	2.57337	1.67917	3.68754	1.55645	0.924298	1.67917	2.22816	3.10904	3.02278	1.11417	1.04278	1.20274	2.66734	1.8127	1.8127	1.3357	2.18764	2.16458	2.87872	2.42475	1.3436	3.78226	3.48759	1.97993	1.4985	1.62419	1.55958	2.02007	1.74226	1.84845	0.854741	1.793	2.45368	1.15482	0.770173	2.47791	3.22856	1.96911	1.35395	2.20834
12.4	101.8		0.949	0.233		0.232	0.489		50	2.3642	1.53117	3.50268	1.51072	0.908861	1.57767	2.03558	3.06562	2.93498	1.05841	0.985853	1.13868	2.58244	1.7085	1.7085	1.21625	2.13079	2.02288	2.67171	2.39025	1.35856	3.38022	3.38884	1.85267	1.373	1.54392	1.52843	1.81957	1.65473	1.94697	0.87549	1.86484	2.45315	1.08264	0.74367	2.43083	3.02769	2.10477	1.39144	2.53162
34	17		0.718	1.935		0.274	0.103		55	2.20211	1.37139	3.31454	1.41964	0.87104	1.46981	1.85612	2.88887	3.05192	0.905001	0.945717	1.064	2.48924	1.63267	1.63267	1.13637	2.07217	1.90213	2.58423	2.26897	1.29537	3.06354	3.31561	1.72382	1.32037	1.53336	1.49762	1.76043	1.5944	1.89047	0.878803	1.93232	2.39143	1.04707	0.734952	2.38219	2.86954	2.22386	1.37627	2.56509
49.2	62		0.477	0.502		0.277	0.433		60	2.09424	1.34477	3.3485	1.3905	0.842095	1.44858	1.76871	2.63994	3.0168	0.813729	0.958452	0.977749	2.4161	1.54024	1.54024	1.11495	1.81658	1.79722	2.74846	2.02834	1.14945	2.90847	3.29044	1.66819	1.2797	1.63176	1.45432	1.87009	1.58952	1.71367	0.848464	1.92378	2.31505	1.04166	0.730767	2.26728	2.68977	2.19178	1.3339	2.14383
40.2	45.4		0.214	0.275		0.651	0.427		65	2.01589	1.3548	3.34754	1.42465	0.844604	1.63904	1.70098	2.53304	2.7673	0.807362	0.962698	0.943208	2.38523	1.56822	1.56822	1.15335	1.4457	1.57296	2.65129	1.75216	1.06126	2.72118	3.13079	1.64742	1.16458	1.81289	1.28974	1.89562	1.72709	1.774	0.857008	1.96353	2.28471	1.04951	0.737916	2.13441	2.56893	2.20416	1.33093	2.02892
25.6	41.8		0.174	0.717		0.352	0.444		70	1.95839	1.3739	3.18275	1.4042	0.839973	1.72799	1.62707	2.54616	2.47573	0.823956	0.956523	0.909247	2.32657	1.53021	1.53021	1.13135	1.31192	1.53107	2.39694	1.58458	1.05686	2.50995	2.96304	1.56663	1.08625	1.67928	1.18025	1.82838	1.74854	1.72134	0.840094	1.95743	2.22299	1.04515	0.736172	2.00364	2.47111	2.13563	1.2842	1.93023
21.8	95.4		0.393	0.429		0.249	0.503		75	1.90398	1.50087	3.11444	1.43141	0.814694	1.7662	1.54815	2.54983	2.40993	0.772821	0.966943	0.892652	2.23819	1.44588	1.44588	1.14968	1.17831	1.42053	2.09629	1.3649	1.05738	2.32934	2.81658	1.49058	1.00616	1.4207	1.05157	1.7041	1.65944	1.49292	0.81795	1.81986	2.09675	1.0244	0.709145	1.84409	2.29291	1.97661	1.16825	1.78969
14.4	52.6		0.092	0.171		0.62	0.73		80	1.82814	1.57073	3.0114	1.37718	0.80138	1.68245	1.49856	2.37404	2.30573	0.715125	0.928543	0.86197	2.1365	1.44916	1.44916	1.09932	1.00563	1.20049	1.88488	1.18377	0.985566	2.11952	2.63492	1.41859	0.91674	1.26457	0.956522	1.61046	1.59614	1.34262	0.779589	1.6828	2.0209	1.00156	0.705833	1.76877	2.08262	1.8223	1.12693	2.01968
60.4	48.4		0.251	0.26		0.408	0.535		85	1.76659	1.55876	2.87092	1.32971	0.791731	1.57632	1.42697	2.21735	2.32811	0.696407	0.889371	0.818361	2.09443	1.43604	1.43604	1.07056	0.847914	0.973948	1.8333	1.01091	0.877662	1.94878	2.40855	1.33586	0.809541	1.14047	0.869917	1.50995	1.52431	1.41847	0.780287	1.69972	1.96632	0.983772	0.69415	1.70878	1.96475	1.80643	1.12396	2.15638
29.8	61.8		0.135	0.744		0.828	0.233		90	1.7058	1.52306	2.94656	1.33396	0.766646	1.51747	1.36831	2.18069	2.54886	0.713581	0.867952	0.829167	1.96495	1.33473	1.33473	1.04567	0.820806	0.807604	1.89526	1.03098	0.916916	1.85918	2.43549	1.26738	0.742827	1.13677	0.80866	1.42668	1.44689	1.39911	0.784123	1.72709	1.90686	0.941924	0.67497	1.64043	1.87461	1.83398	1.11141	1.84549
36.8	40.6		0.219	0.557		0.482	0.359		95	1.6153	1.43546	2.82384	1.2423	0.765681	1.41694	1.322	2.15155	2.46512	0.658972	0.826079	0.792117	1.8814	1.31987	1.31987	0.996659	0.967435	0.879071	1.99384	1.19486	0.968491	1.87449	2.48865	1.26245	0.808308	1.21334	0.874494	1.49551	1.40469	1.38847	0.785692	1.73895	1.8685	0.914897	0.658754	1.58603	1.80381	1.83973	1.1121	1.69344
41	46		0.195	0.62		0.287	0.34		100	1.56417	1.34438	2.64747	1.20699	0.733649	1.35596	1.2753	2.07166	2.21446	0.628098	0.786714	0.738859	1.83547	1.31775	1.31775	0.98045	0.965323	0.907059	1.92924	1.16159	0.971484	1.82204	2.40996	1.23605	0.8326	1.21809	0.89192	1.51118	1.35447	1.35848	0.776974	1.72796	1.79457	0.884383	0.641666	1.51384	1.73389	1.78428	1.05927	1.58795
53.4	21.4		0.147	0.743		0.705	0.279		105	1.49644	1.27704	2.46917	1.15508	0.728632	1.2836	1.22976	1.96862	2.00065	0.617678	0.768383	0.722457	1.77951	1.24828	1.24828	0.953049	0.900546	0.861116	1.76025	1.11759	0.934695	1.71959	2.38127	1.19328	0.795459	1.17708	0.846154	1.47421	1.30792	1.25073	0.755178	1.59266	1.71837	0.861192	0.622834	1.43137	1.6359	1.68054	0.976099	1.51698
24	27.4		0.333	0.598		0.331	0.405		110	1.45611	1.24481	2.364	1.15721	0.71609	1.26391	1.19734	1.89452	1.93292	0.606293	0.768576	0.720914	1.69538	1.27048	1.27048	0.950348	0.978525	0.884703	1.76061	1.19046	0.927478	1.71079	2.34131	1.17145	0.806196	1.22461	0.866221	1.45291	1.29501	1.2169	0.741578	1.53041	1.67984	0.844453	0.610803	1.40347	1.5754	1.62474	0.953781	1.53547
46.8	46		0.338	0.782		0.293	0.24		115	1.4343	1.21394	2.32117	1.13154	0.688303	1.24655	1.16705	1.86828	1.8978	0.616713	0.758349	0.717054	1.64463	1.26025	1.26025	0.952471	0.982397	0.88576	1.81324	1.13272	0.917444	1.6777	2.2401	1.14593	0.801443	1.21105	0.852843	1.41947	1.29066	1.20748	0.739659	1.50635	1.67077	0.824053	0.604526	1.37609	1.52431	1.63485	0.969648	1.93947
46.4	36.4		0.595	0.295		0.199	0.691		120	1.39648	1.19271	2.29299	1.1134	0.704126	1.23285	1.13772	1.83412	1.85303	0.596452	0.748893	0.693127	1.58231	1.20313	1.20313	0.919474	0.802676	0.772223	1.79845	0.974124	0.887872	1.55025	2.14205	1.11512	0.730329	1.14557	0.758317	1.37405	1.28176	1.2237	0.74367	1.5107	1.62753	0.805918	0.603305	1.36354	1.50739	1.66258	0.991095	1.97312
36.8	50.6		0.243	0.385		0.289	0.405		125	1.35306	1.15103	2.29222	1.11823	0.667463	1.20815	1.10511	1.77816	1.88333	0.568472	0.735	0.671322	1.53329	1.20004	1.20004	0.934911	0.823975	0.74846	1.71695	1.11371	0.937159	1.52596	2.22003	1.08132	0.680162	1.38585	0.732794	1.31702	1.26188	1.23207	0.738613	1.49658	1.58777	0.785692	0.587264	1.31821	1.46746	1.65961	0.982551	1.65665
33.4	24.2		1.03	1.244		0.118	0.135		130	1.32779	1.15547	2.28084	1.10472	0.682128	1.18383	1.07751	1.74632	2.09134	0.564227	0.725352	0.67576	1.48254	1.16203	1.16203	0.918895	1.09805	1.00422	1.82556	1.3994	0.955114	1.62014	2.22549	1.09118	0.791762	1.5279	0.857067	1.35768	1.238	1.23957	0.744542	1.48699	1.55918	0.770522	0.577325	1.30147	1.44183	1.66083	0.974879	1.5257
14.6	38.8		0.112	1.191		0.38	0.144		135	1.28147	1.0723	2.1282	1.05706	0.65685	1.13579	1.03544	1.66586	2.04696	0.578699	0.700267	0.652604	1.42002	1.13193	1.13193	0.883968	1.06847	1.14997	1.78578	1.3091	0.91498	1.58335	2.17286	1.05052	0.841753	1.3612	0.855483	1.36349	1.20417	1.2373	0.739311	1.44741	1.5318	0.753957	0.570873	1.2774	1.40103	1.64218	0.969648	1.48595
31.8	13.4		0.22	0.806		0.389	0.329		140	1.24655	1.09102	2.05198	1.04297	0.638904	1.12016	1.0175	1.63614	1.9418	0.560946	0.700074	0.644886	1.37699	1.10761	1.10761	0.894967	0.977117	1.04154	1.72065	1.21792	0.914804	1.51839	2.13307	1.04401	0.777504	1.22566	0.80426	1.3385	1.17034	1.20243	0.730592	1.41393	1.50687	0.744019	0.569479	1.23678	1.38359	1.61236	0.951165	1.47862
36.8	53.6		0.179	0.37		0.732	0.406		145	1.21818	1.0833	1.98502	1.0449	0.663603	1.09372	0.988941	1.59157	1.81	0.530651	0.694285	0.633115	1.34728	1.11746	1.11746	0.890722	1.09611	0.977645	1.71836	1.36508	0.95881	1.53089	2.12515	1.05615	0.749868	1.2151	0.807076	1.32371	1.1264	1.21202	0.728674	1.41463	1.47914	0.727628	0.558668	1.22649	1.34802	1.61393	0.947852	1.52884
62.6	11.2		0.478	1.904		0.271	0.327		150	1.22918	1.1134	2.00027	1.06285	0.637167	1.13077	0.986239	1.56571	1.7415	0.520038	0.719177	0.625204	1.2973	1.10433	1.10433	0.909247	0.964091	0.964267	1.70445	1.0984	0.860412	1.47404	2.02183	1.0081	0.7768	1.13096	0.791586	1.32213	1.07531	1.19876	0.722223	1.40731	1.43241	0.710192	0.552739	1.20766	1.32134	1.58865	0.944539	1.81358
13.8	23		0.141	0.566		0.622	0.427		155	1.2178	1.12324	1.97325	1.07809	0.643342	1.10761	0.96482	1.55047	1.70908	0.521003	0.704705	0.633308	1.27839	1.10337	1.10337	0.908282	0.725224	0.728921	1.55237	0.8583	0.761838	1.33586	1.86305	1.0088	0.653934	1.01232	0.655166	1.30224	1.04218	1.20365	0.711412	1.38691	1.40207	0.69973	0.542975	1.20051	1.30251	1.59963	0.94018	2.0277
62.6	44		0.326	0.683		0.315	0.492		160	1.2066	1.15335	1.97904	1.09816	0.650675	1.11784	0.946103	1.54236	1.71873	0.543194	0.730562	0.634466	1.23844	1.09951	1.09951	0.941858	0.684915	0.610104	1.42528	0.852315	0.749516	1.2915	1.88646	0.973244	0.579827	0.999648	0.605351	1.21387	0.99528	1.19737	0.707751	1.38499	1.38708	0.688745	0.545416	1.15953	1.29048	1.57853	0.930241	1.75691
20.2	85.4		0.192	0.482		0.569	0.376		165	1.20448	1.17477	1.98232	1.11688	0.620379	1.13482	0.929122	1.52017	1.72587	0.567121	0.742333	0.620379	1.21066	1.10703	1.10703	0.941665	0.754093	0.631931	1.42545	0.929766	0.763422	1.31104	1.91832	0.973596	0.599366	1.03256	0.642316	1.23675	0.978192	1.17854	0.69694	1.39144	1.35657	0.680724	0.542452	1.14244	1.25386	1.57208	0.924662	1.55865
28.8	66		0.231	0.357		0.44	0.605		170 (s)	1.19618	1.17303	1.97865	1.10144	0.632536	1.11688	0.91793	1.48544	1.69365	0.560368	0.745999	0.614012	1.17419	1.07404	1.07404	0.929315	0.812181	0.668192	1.44851	0.998592	0.772399	1.32389	1.95283	0.975709	0.619609	1.05809	0.670305	1.26685	0.947678	1.16651	0.693627	1.39039	1.34541	0.67898	0.534431	1.14384	1.24532	1.57417	0.910189	1.50408
36.2	68.8		0.559	0.261		0.302	0.512
	29		0.626	0.346		0.356	0.558
	103.6		0.513	0.846		0.339	0.278
	26.4		0.486	0.444		0.368	0.365		Fig. 5l
	48.6		0.462	0.425		0.218	0.32			DMSO												CTS													Uro
	22.6		0.924	0.425		0.162	0.32		0	0.921585	0.598341	1.21928	1.25741	1.05968	0.633215	0.770853	0.881565	0.952307	1.02315	1.00389	0.728464	1.05577	0.873773	1.21064	1.23582	1.26869	1.2319	1.04752	1.17105	0.936026	1.08361	0.644069	0.468083	0.77305	1.02116	0.921356	0.681748	0.838556	1.02321	1.29755	0.994631
	20.6		0.275	0.902		0.283	0.266		5	0.910096	0.602595	1.22419	1.23472	1.05066	0.630439	0.759135	0.862051	0.958803	1.02774	0.998568	0.721764	1.11817	0.889861	1.23092	1.24939	1.31821	1.22113	1.07382	1.1751	0.935186	1.1004	0.677643	0.505714	0.757942	1.01486	0.92502	0.675593	0.837677	1.01573	1.29198	1.01031
	96.8		0.331	0.567		0.466	0.316		10	0.918553	0.595794	1.23184	1.23362	1.04126	0.618924	0.750143	0.850486	0.94762	1.04266	0.999052	0.709104	1.15076	0.901472	1.22588	1.25764	1.32577	1.2035	1.06948	1.18168	0.931129	1.09061	0.697088	0.523341	0.758641	1.01178	0.921796	0.680722	0.836358	1.00621	1.30693	1.01134
			0.47	0.179		0.44	0.554		15	4.07064	0.586648	5.26002	5.77557	5.50803	3.90506	4.43208	4.50172	4.81266	1.59485	4.95453	4.89579	0.931549	1.11061	5.58286	4.9297	1.3066	8.09268	8.80474	8.33666	8.79733	10.3666	0.700585	3.34149	7.36314	2.40033	8.07311	7.41027	8.15416	10.7097	11.487	0.997415
			0.202	0.224		0.531	0.606		20	4.78749	4.90921	5.26427	5.72576	5.40919	4.09156	4.08863	4.37402	4.83717	5.19923	4.77037	4.68993	4.80827	7.37783	9.11642	9.39201	10.0596	9.42209	7.75484	8.89539	8.61407	9.36096	4.90326	2.86991	6.87044	6.0075	7.38609	7.05211	7.54334	10.0578	10.8816	5.44372
			2.531	0.17		0.196	0.557		25	4.60795	4.82015	5.12426	5.62348	5.23813	3.77423	3.63277	4.09936	4.67678	4.98686	4.35522	4.16847	6.71851	7.33265	8.95261	8.58595	9.06256	8.98073	5.79046	8.15102	8.16599	7.02446	4.89123	2.78094	5.56859	5.39903	6.29987	6.23319	6.63209	9.05207	9.97709	5.17319
			0.266	0.556		0.55	0.324		30	4.39259	4.66193	4.98235	5.43525	4.70241	2.97825	2.74229	3.23144	4.33211	4.62948	3.77089	2.76959	7.01243	6.63542	8.57476	6.46783	7.62446	8.25468	3.99913	6.61765	7.33754	3.83364	4.61354	2.38392	3.26371	4.11716	4.07964	4.72431	5.46732	7.51931	8.23857	4.63976
			0.747	0.369		0.21	0.268		35	3.92053	4.47416	4.51403	4.5328	3.6102	1.83349	1.79416	2.44564	3.62546	3.75107	3.70782	1.85823	6.79336	4.91963	7.85081	4.13021	5.5374	7.05678	4.57479	5.72261	6.04367	3.04967	3.84063	1.62514	2.04678	3.09542	3.4486	2.94447	4.32511	5.76789	6.36537	3.86202
			0.221	0.73		0.595	0.245		40	3.52099	4.05205	3.37293	3.55311	3.75874	1.11756	1.53366	2.29779	2.72191	3.23376	3.6361	2.16374	5.67841	3.60267	6.54183	3.17348	5.06833	5.32742	5.74052	5.82823	4.17232	4.45826	3.088	1.11579	1.82938	2.55875	4.79349	1.90646	3.15873	4.63023	5.41339	3.85791
			0.333	1.211		0.487	0.172		45	3.378	3.22131	2.60365	3.99751	4.46282	1.08019	1.63166	2.47004	2.14	3.34078	3.28927	2.78009	3.35674	3.01596	4.48945	2.97511	4.96453	3.81055	6.17461	5.99876	2.79759	5.75283	2.92964	1.2077	1.92619	2.98844	4.79788	1.55445	2.64536	4.82089	6.12357	4.83789
			0.677	0.328		0.321	0.317		50	3.33625	2.25377	2.24424	4.64428	4.17422	1.62231	2.02921	2.32451	2.03889	3.72458	3.64018	2.76346	1.81749	2.97455	2.64944	3.9026	5.07197	2.80612	5.54089	5.81019	2.1005	5.87692	3.00743	2.47261	2.67168	4.33332	3.88239	1.45406	2.82166	5.62413	6.9035	4.83174
			0.914	0.535		0.276	0.402		55	3.32774	1.67038	2.76017	4.74403	3.74032	2.04447	2.13042	2.46834	2.28607	3.94157	3.36068	2.56664	1.42383	3.12591	1.83218	5.04133	4.72098	2.28362	4.3199	5.54635	1.90339	5.08302	3.14396	2.75478	3.5863	4.97784	4.96378	1.56705	3.32286	6.09953	7.01283	3.86304
				0.403		0.062	0.507		60	3.32213	1.44361	3.56572	4.6095	4.34903	2.19675	2.1579	2.47498	2.81677	3.80495	3.16814	2.61588	1.35766	3.75124	1.54134	5.17199	5.08288	2.1987	4.85122	5.29594	1.87583	4.69832	3.20006	2.53039	3.40374	4.24803	4.89417	2.5183	4.01926	6.08385	6.69189	3.51733
				0.456			0.567		65	3.19581	1.71251	3.77901	4.24678	4.06687	2.09267	2.10548	2.3834	3.21107	3.66606	3.46069	2.6368	1.3371	4.26912	1.38285	4.65103	4.55143	2.28921	5.40338	5.06148	2.22318	4.90424	2.98966	2.29928	3.04841	3.39951	3.96577	2.96924	3.95141	5.59892	6.72442	3.88195
				0.463			0.482		70	3.12519	2.37113	3.79155	3.96826	3.43932	1.89093	1.97393	2.1256	3.32213	3.55168	2.92601	2.53352	1.34144	3.94037	1.35766	4.23303	4.76267	2.77548	4.79554	4.58948	3.09248	5.06218	2.95049	2.15282	2.84781	3.33796	4.66481	2.91897	3.64351	5.19694	6.86657	4.07979
				0.3			0.461		75	3.11814	2.60409	3.66053	4.01129	4.02617	1.73992	1.88734	2.39637	2.98045	3.38556	3.13431	2.42732	1.32381	3.47187	1.35095	4.07887	4.58906	3.73921	4.09048	4.6597	3.35702	4.82939	2.76989	2.26767	3.01036	4.04154	4.57293	2.78678	3.53638	5.59423	6.70698	4.29991
				0.239			0.606		80	3.07916	2.52135	3.43812	3.66744	3.80296	1.79951	1.80007	2.36662	2.79357	3.32707	3.00077	2.27547	1.32843	3.09947	1.38075	3.7974	4.45252	4.14098	4.6723	4.63452	3.23055	4.55227	2.60146	2.40141	2.92545	4.28349	4.1006	2.56681	3.64263	5.36459	6.19728	3.92078
				0.432			0.738		85	2.98195	2.23942	3.30486	3.58923	3.52779	1.68286	1.77808	2.3051	2.8047	3.2976	2.88639	2.20256	1.32857	2.99595	1.49028	3.60659	4.47518	4.0397	4.83779	4.37012	2.98183	4.28829	2.40994	2.16401	2.78625	4.10338	4.17431	2.41997	3.63897	5.432	6.2263	3.94511
				0.265			0.599		90	2.95011	2.06892	3.07918	3.41868	3.51638	1.57559	1.73534	2.10635	2.6759	3.20396	2.84143	2.10454	1.32199	2.95958	1.63311	3.45774	3.74354	3.71556	4.53436	4.23947	2.66217	4.19652	2.33412	1.98103	2.8008	3.51206	3.88195	2.25422	3.46047	5.35462	6.39718	3.78317
				0.137			0.523		95	2.97319	1.93371	2.91337	3.03313	3.43091	1.43657	1.63158	2.11857	2.55189	3.20222	2.80345	1.90235	1.31793	2.75967	2.06762	3.21768	3.25685	3.29896	4.3206	4.10825	2.4347	3.99395	2.16331	1.91724	2.64258	3.29458	3.91551	2.07998	3.31026	4.75025	6.00164	3.93163
				0.206			0.533		100	2.87045	1.90123	2.79372	2.70619	3.16684	1.36833	1.50492	1.88029	2.41807	3.08423	2.66003	1.76272	1.31192	2.77688	3.20789	3.12997	2.89719	3.01218	4.38439	4.02249	2.27704	3.70172	2.0216	1.78658	2.50031	3.39907	4.11203	2.03543	3.05101	4.6443	5.76818	4.0093
				0.412			0.524		105	2.83883	1.79986	2.67356	2.44408	2.97927	1.25293	1.35506	1.8153	2.32311	2.97015	2.5619	1.65486	1.33136	2.87481	4.05649	2.97875	2.82039	2.69994	4.38048	3.7525	2.10148	3.36961	1.86254	1.6036	2.47513	3.6227	3.79827	1.90793	2.86856	4.58319	5.5869	3.52437
				0.608			0.472		110	2.72491	1.6824	2.50033	2.21382	2.94002	1.1331	1.26791	1.84824	2.07269	2.81578	2.51493	1.56677	1.34186	2.63279	4.33207	3.00533	2.74205	2.44645	4.02669	3.65975	1.92031	3.46795	1.65382	1.49252	2.3379	3.26732	3.50854	1.85194	2.86387	4.3934	5.51685	3.18804
				0.263			0.43		115	2.6332	1.58061	2.32634	2.05084	2.76921	1.07053	1.22129	1.90497	2.01028	2.68122	2.37273	1.50581	1.34032	2.38854	4.26003	2.83396	2.68861	2.0949	3.8763	3.52125	1.76042	3.31099	1.52959	1.40383	2.23955	3.10113	3.56511	1.80036	2.80862	4.34094	5.49985	3.05585
				0.117			0.667		120	2.49883	1.44773	2.12216	1.88345	2.5456	1.03675	1.18002	1.80672	1.93276	2.49842	2.20572	1.38415	1.35738	2.05993	4.00626	2.57544	2.57278	1.85219	3.94835	3.31085	1.58625	3.05849	1.37753	1.36606	2.2762	3.39745	3.54606	1.70847	2.66925	4.02337	5.14872	2.93216
				0.238			0.753		125	2.36646	1.37729	1.944	1.74716	2.34206	0.964484	1.11198	1.90444	1.75324	2.23451	2.04788	1.31577	1.34102	1.99082	3.72256	2.49863	2.38812	1.66585	3.90904	2.96154	1.4444	2.81074	1.29066	1.29429	2.28516	3.45358	3.51118	1.62128	2.62514	3.91316	4.8694	3.11344
				0.197			0.661		130	2.2088	1.28923	1.82801	1.65448	2.24798	0.895703	1.04674	1.79895	1.73867	2.09111	1.99477	1.22998	1.3399	1.87331	3.28483	2.33524	2.38462	1.517	3.84427	2.89411	1.36368	2.58467	1.19105	1.18056	2.10763	3.10216	3.51176	1.55606	2.48137	3.62373	4.83042	3.17485
				0.217			0.451		135	2.09325	1.18927	1.69881	1.58055	2.07032	0.816911	0.980813	1.78562	1.64317	1.90148	1.87784	1.12683	1.36396	1.81721	2.92671	2.14512	2.40728	1.40215	3.56952	2.73267	1.29401	2.36853	1.11747	1.14531	1.96186	2.74546	3.13777	1.47986	2.36238	3.3022	4.42755	3.01408
				0.552			0.306		140	1.93024	1.15648	1.57047	1.51748	1.87254	0.752384	0.915675	1.73457	1.44276	1.77273	1.78784	1.04394	1.389	1.77091	2.61223	2.04664	2.60733	1.28926	3.32498	2.67588	1.23204	2.11323	1.03255	1.04025	1.8589	2.82738	3.18261	1.41713	2.20572	2.97466	4.30474	2.62455
				0.296			0.351		145	1.78817	1.0957	1.47519	1.46732	1.67247	0.694914	0.838131	1.67575	1.37274	1.6556	1.63637	0.970292	1.41544	1.69327	2.28963	1.95669	2.60327	1.21078	3.32051	2.38084	1.15384	1.92969	0.963445	0.967362	1.79539	3.19419	3.08106	1.35397	2.03249	2.82811	4.01692	2.72655
				0.265			0.34		150	1.64432	0.997651	1.41872	1.44442	1.48067	0.66888	0.784125	1.65155	1.16227	1.54377	1.53857	0.947543	1.4416	1.54078	2.01656	1.78224	2.56284	1.17035	3.20733	2.25368	1.09369	1.82225	0.936585	0.913923	1.66445	2.98888	2.80144	1.29462	1.90793	2.62001	3.86172	2.73872
				0.491			0.572		155	1.50441	0.940869	1.32808	1.38647	1.38789	0.669083	0.774573	1.72041	1.02455	1.45782	1.43571	0.89448	1.56107	1.46147	1.78336	1.63018	2.31132	1.12614	3.14998	2.06762	1.04458	1.70502	0.896436	0.885664	1.55184	2.86724	2.7201	1.21988	1.83113	2.41997	3.49975	2.82796
				0.899			0.197		160	1.39052	0.909281	1.26778	1.32601	1.31631	0.675121	0.776993	1.59278	0.904797	1.35546	1.32214	0.861516	1.79133	1.36858	1.6001	1.51113	2.19576	1.09285	3.10465	1.90017	0.994221	1.60458	0.862862	0.868317	1.42509	2.87017	2.64654	1.13166	1.75405	2.23649	3.20753	2.71791
				0.311			0.376		165	1.27063	0.854511	1.18912	1.25841	1.1951	0.691348	0.77442	1.58254	0.838156	1.27907	1.26903	0.840118	2.52801	1.34577	1.43559	1.42173	2.08329	1.06515	2.87523	1.71341	0.947917	1.53337	0.827189	0.848173	1.3329	2.66573	2.52358	1.06234	1.62084	2.08833	2.9685	2.35065
				0.902			0.175		170	1.16795	0.814797	1.1236	1.22998	1.09657	0.695755	0.784355	1.60626	0.774471	1.16438	1.19021	0.806772	3.84804	1.2561	1.34018	1.39474	1.88534	1.04472	2.80388	1.65857	0.907208	1.52987	0.814039	0.797531	1.22225	2.63188	2.38964	1.00562	1.54375	1.94486	2.7925	2.37908
				0.561			0.422
				0.524			0.294
				0.371			0.506		Fig. 5E cal
				0.674			0.333		0	1	4	24 (h)
				0.232			0.609		1.06673	1.38885	1.58325	1.95257
				0.078			0.608		0.897933	1.5531	1.47183	1.62765
				0.441			0.291		1.03534	1.08195	1.83504	1.77386
				0.739			0.374
				0.312			0.44
				0.606			0.304		Fig. 5I dqbsa
				0.327			0.829		DMSO	CTS
				0.181			0.562		0.883602	1.58029
				0.333			0.626		0.948271	1.42297
				0.482			0.459		1.16813	1.71789
				0.423			0.766
				0.307			0.472
				0.595			0.499
				0.253			0.471
				0.262			0.757
				0.423			0.581
				0.213			0.707
				0.546			0.588
				0.295			0.541
				0.959			0.313
				0.548			0.36
[truncated: 22 more columns]

## Sheet: Fig. 6
Fig. 6b			Fig. 6c			Fig. 6d			Fig. 6f
DMSO	CTS		DMSO	CTS		DMSO	CTS			yellow			red
0.0382	0.0324		1.024	1.582		0.494	0.652		DMSO	14.5	9.6	19.6	5	4.3	7.625
0.035	0.032		0.594	0.443		0.723	0.866		CTS	6.25	3.4	4	15.75	22.4	22.3
0.038	0.0182		1.077	2.107		0.321	0.209
0.0392	0.017		1.821	1.043		0.128	0.809		Fig. 6g
0.0166	0.016		0.882	0.554		0.83	0.801		DMSO	CTS
0.0094	0.0186		0.911	1.481		0.773	0.628		1.07938	0.442081
0.021	0.0182		0.441	1.812		0.438	0.55		0.979004	0.641475
0.0324	0.0104		1.387	0.907		0.48	0.897		0.941613	0.304221
0.0486	0.0196		0.74	0.575		0.456	0.862
0.0312	0.0262		0.852	0.405		0.833	0.821		Fig. 6h
0.039	0.033		0.938	0.495		0.295	0.51		CTS-, Baf-	CTS+, Baf-	CTS-, Baf+	CTS+, Baf+
0.0568	0.0148		1.078	1.086		0.317	0.176		1.06944	0.743523	1.31577	1.55159
0.0226	0.0154		3.93	0.909		0.283	0.392		1.08373	0.772463	1.36768	1.22852
0.0396	0.0312		1.717	0.764		0.765	0.503		0.846835	0.708049	1.63622	1.02087
0.0252	0.0164		0.613	0.758		0.331	0.69
0.0222	0.0136		0.927	0.263		0.23	0.542		Fig. 6k
0.0396	0.0324		0.82	0.767		0.265	0.9		ox-	ox+	ox+, CTS 5	ox+, CTS 10
0.0218	0.0288		2.83	0.603		0.314	0.452		0.02272	1	0.45767	0.103567
0.022	0.0172		0.557	0.638		0.771	0.57		0.01	1.1	0.3	0.05
0.0212	0.0354		2.22	0.435		0.119	0.363		0.034483	0.66	0.263636	0.173077
0.0466	0.0178		0.416	1.876		0.311	0.429
0.0302	0.0256		0.778	0.537		0.637	0.268
0.018	0.0142		1.118	4.411		0.711	0.169
0.0514	0.0184		0.39	0.633		0.632	0.706
0.0368	0.024		0.663	0.575		0.359	0.684
0.0214	0.014		1.443	0.501		0.169	0.651
0.0108	0.0184		1.103	1.23		0.174	0.221
0.02	0.0108		0.541	0.532		0.476	0.383
0.0176	0.0166		0.416	0.514		0.66	0.69
0.0168	0.02		0.906	0.328		0.194	0.438
0.015	0.019		2.121	1.108		0.247	0.238
0.016	0.0188		2.962	1.408		0.124	0.315
0.0158	0.0182		1.04	1.301		0.33	0.437
0.024	0.0356		1.037	1.381		0.136	0.432
0.0196	0.0218		0.609	1.374		0.393	0.668
0.0308	0.0176		2.02	0.62		0.322	0.334
0.0162	0.0288		2.157	0.647		0.224	0.811
0.0264	0.0124		0.458	1.241		0.281	0.641
0.0092	0.0328		4.381	1.08		0.188	0.361
0.0114	0.0338		1.369	0.465		0.282	0.854
0.012			0.621	2.312		0.601	0.449
0.0404			1.426	0.597		0.388	0.807
0.0382			1.137	0.519		0.47	0.69
0.0124			1.422	1.133		0.327	0.471
0.026				0.976			0.543
0.0184
0.0358

## Sheet: Fig. 7
Fig. 7b
	Veh							CTS
0	18.6	23	20.2	18.8	19.9	32.1	21.9	19	19.6	23.9	20	18.2	31.5	22.1
4	18.9	22.9	19.8	19.1	20.4	32	23.2	19.8	20.9	24.6	20.9	19.2	31.5	22.8
8	19.7	24.3	20.8	19.3	20.9	32.6	24.5	19	21.5	24.2	21	20.2	32.3	23.7
12	20.5	24	20.7	20.3	21.5	32.5	24.7	20	21.9	23.8	21.8	20.6	32	23.3
16	20.6	23.6	20.8	20.6	21.5	33	25.3	19.7	22.2	24.6	21	20.1	32.4	23.8
20	20.5	23.8	21.6	20.6	21.8	33.9	26.2	20.1	22	25.1	21.6	20.5	32.5	24.2
24	19.9	24.1	21.1	22.4	21.5	33.9	26.9	20.2	22.3	25.1	21.8	21.4	32	24.3
28	20.5	23.9	20.6	22	21.2	34.8	27.6	20.6	22	24.7	22.3	22	31.7	24.6
32	20.9	23.9	21	22	21.7	34.8	28.5	21.1	22.3	24.8	22.3	22	31.4	25.3
36	20.6	24.3	21.2	22.3	22	35	29.2	21.1	22.1	25.7	22.7	22.6	31.9	26.3
40	20.8	24.7	21.5	22.6	21.5	35.1	28.6	20.9	22.1	26	23.1	22.5	32.1	25.9
44	20.6	25.1	21.9	22.1	21.1	35.7	29.1	20.7	22	26	22.9	22.2	31.9	25.8
48	20.9	25.5	22.3	22.7	21	35.9	28.7	21	22.4	25.7	23.4	22.5	32.3	26.1
52	21.3	26.8	22	22.8	22	36.2	28.1	21	22.8	26.4	23.6	22.9	33	25.9
56 (days)	21.5	26.8	22	23.3	22.1	36.2	28.7	21	22.2	26.4	24	23.1	32.3	25.6
Fig. 7c			Fig. 7d			Fig. 7e			Fig. 7f			Fig. 7h			Fig. 7i			Fig. 7j			Fig. 7l
Veh	CTS		Veh	CTS		Veh	CTS		Veh	CTS		Veh	CTS		Veh	CTS		Veh	CTS		DMSO	CTS
1208	852		115	96		0.994794	0.358786		8.492	6.878		1	0.388		8	1		0.113238	0.0555		2.72222	2.33333
1044	1138		92	76		0.813173	0.397995		18.562	7.047		0.9	0.482		7	2		1.00294	0.452482		2.31579	2.55556
1016	1112		136	116		1.41421	0.414577		9.524	7.274		1.1	0.45		0	2		1.68233	1.04631		2.66667	2.21053
1041	305		103	53		0.777818	0.51739		14.837	11.452					11	3		1.55491	0.824455
1304	608		136	80		1.05235	0.7413		11.627	7.523					4	2		1.95939	0.507404
									10.8	9.8					4	1
															2	0
															3	0
															2	2
															3	1
															0	1
															2	4
															1	3
															3	5
															3	4
															4	3
															1	3
															5	1
															4	1
															5	3
															2	4
															9	1
															5	2
															6	5
															2	4
															2	1
															2	3
															7	4
															7	2
															4	4
															9	2
															6	0
															6	0
															7	1
															5	4
															8	1
															3	0
															6	0
															0	1
															9	1
															9	4
															7	1
															1	3
															4	1
															3	0
															5	0
															5	1
															10	1
															7	4
															6	1
															1	3
															3	2
															5	4
																0
																1
																1
																2
																2
																2
																6
																4
																4
																2
																2
																0
																1
																4
																0
																0

## Sheet: Fig.S5-S11
Fig. S5d			Fig. S5h
WT	KO		si-	siHYOU1
2.09091	0.555556		1	1.8
3.63636	1.63636		1	1.3
2.875	1.33333		1	1.5
Fig. S6a										Fig. S6e
	oxLDL									DMSO	CTS
DMSO	DMSO	Uro A	Rapa	CTS	DHT	Tan II A	Kaem	Tiliro		0.902269	0.743561
27.3	42.2	15.25	21.6667	33.1429	25	45	27.4657	19.1754		0.931492	0.608554
17.6	34.6	16.5714	44.2	18.5	22.3333	22	28.9671	32.3616		1.16624	0.723723
14.5	33.5	27.2857	21.8	9.71429	17	25	33.096	23.6633
12	40.5	22.3333	25	24.125	28.6	31.3333	27.7432	35.087
5.4344	45.8	21.2	27.4	7.875	21.6	26.2857	12.0764	37.8123
Fig. S7b				Fig. S7c (left)				Fig. S7c (right)
	pronase 1	pronase 2.5			DMSO	CTS			DMSO	CTS
DMSO	1	1.47		pronase 1	1	1.19		pronase 1	1	1
CTS	0.36	0.36		pronase 5	1	0.96		pronase 5	0.76	0.7
				pronase 10	0.44	0.43		pronase 10	0.35	0.48
Fig. S9a-1			Fig. S9a-2			Fig. S9a-3			Fig. S9a-4			Fig. S9a-5			Fig. S9a-6
DMSO	CTS		DMSO	CTS		DMSO	CTS		DMSO	CTS		DMSO	CTS		DMSO	CTS
1.19933	0.718925		0.923333	0.858654		0.87338	0.791389		1.14515	0.822371		1.0455	0.830582		1.06001	0.777045
0.776708	0.403136		1.32124	0.520723		0.862031	0.473298		0.906726	0.725316		1.22926	0.773833		0.974745	0.849961
1.02396	0.325196		0.755428	0.556913		1.26459	0.419326		0.832988	0.569207		0.854268	0.745781		0.854573	0.879512
									1.11513	0.869808		0.87098	0.664712		1.07271	0.74318
Fig. S9c				Fig. S9d
DMSO	CTS	Thapsi		DMSO	CTS	Kaem
0.801121	1.23961	3.18008		0.790349	1.19208	2.64758
1.34077	1.3267	4.08468		1.11286	1.25089	4.48499
0.858108	0.940056	4.49858		1.09679	0.976959	4.16025
Fig. S10a								Fig. S10b
	DMSO			CTS				DMSO	CTS
0	0.982297	1.04053	0.977173	0.982297	1.04053	0.977173		1	1.5173
6	1.05597	1.12	1.14025	1.06043	1.06276	1.05231		1	1.2
12	0.987521	1.04265	1.06202	0.943896	0.930992	0.997487		1	1.4
Fig. S10c					Fig. S10d			Fig. S10e (left)				Fig. S10e (right)
0	1	4	12 (h)		DMSO	CTS		24	48	72 (h)		24	48	72 (h)
38	29	56	60		1.00153	1.40688		1.31344	1.80599	0.736378		2.15214	3.38198	2.71488
67	40	88			0.984565	1.19535		1.04445	1.22233	0.903696		1.97258	2.13946	2.72836
33	33	63	58		1.01391	1.27448		1	1.078	0.714		1.77035	1.76975	1.08398
44	69	67	30
29	58	44	82
14	50	77	46
70	31	100	88
33	71	85	82
44	64		56
Fig. S11a			Fig. S11b			Fig. S11f					Fig. S11g			Fig. S11h
Con	oxLDL		Con	oxLDL		yellow		red			DMSO	CTS		DMSO	CTS
2.818	36.89		13.6667	62		Con	oxLDL	Con	oxLDL		1.59691	0.109268		0.843562	1.72961
5.637	6.116		31.2857	39.1		3	23	4	6		1.25667	0.372856		0.742776	0.729376
6.982	14.517		19.4444	34.2		0	18	5	8		1.21206	0.15543		1.28398	0.645226
8.748	14.255		21.3333	46.125		0	15	4	0		0.923363	0.055273		0.996869	1.78487
3.347	33.592		27.25	31.5714		1	9	2	6		0.575361	0.092103		0.553249	0.78407
5.951	21.34					0	27	9	6		0.177151	0.212537		1.15939	1.23623
5.994	23.333					0	9	5	2		1.41565	0.354968		1.03874	1.28472
5.586	28.894					2	6	7	3		0.06105	0.347636		1.39159	0.238004
13.641	5.622					0	5	6	2		0.208982	0.117545		0.962387	1.29264
9.356	19.726					14	6	5	12		1.69724	0.136932		1.40206	1.18633
24.035	15.17					4	5	9	1		0.083992	0.237979		0.505368	1.18757
15.163	4.498					4	6	16	1		2.26513	0.294252		0.962806	2.04175
2.815	6.176						6		5		0.151487	0.470792		0.966897	0.371339
11.233	34.503						14		7		1.93733	0.09988		0.914232	0.233124
16.647	11.395						36		8		2.17275	0.82276		1.19627	0.488135
13.765	15.955						49		13		0.104602	0.365634		0.685457	0.55254
11.563	23.182						7		4		1.01369	0.10388		0.759396	0.357054
9.247	8.865						15		6		1.66796			1.18179	1.23213
16.258	20.256										0.478623			1.72885	1.44527
11.984	5.49										0.478623			1.15842
Fig. S11c
	DMSO																																	Xest C
0	1.00542	0.427596	1.00483	1.46416	0.88869	1.06473	1.39499	1.224	1.15731	0.902843	0.942927	1.12288	0.691772	0.797204	0.701353	1.00026	0.890012	1.03297	1.64362	0.834325	0.733267	0.722609	0.617053	1.23005	1.02495	1.53122	0.973224	1.09007	1.01903	0.927853	0.825671	1.30989	0.593928	0.965542	1.15776	0.858383	1.02428	0.927036	1.41742	1.42159	1.051	1.21303	0.595035	0.610401	0.69153
5	1.01309	0.445765	0.996259	1.44776	0.882312	1.06046	1.41177	1.22927	1.16572	0.922937	0.946098	1.10306	0.70611	0.796791	0.706213	1.01967	0.911426	1.03776	1.56236	0.854908	0.74637	0.728867	0.616613	1.23694	1.05282	1.52217	0.965206	1.08059	0.982318	0.956748	0.823666	1.31932	0.590896	0.856353	1.14237	0.897024	0.963004	0.888632	1.41711	1.40288	1.03216	1.21906	0.583167	0.597626	0.695054
10	1.06878	0.514798	1.07113	1.44883	0.904876	1.0596	1.40009	1.22138	1.17912	0.919111	0.959195	1.09458	0.703663	0.791517	0.709556	1.02197	0.910497	1.03038	1.5362	0.844054	0.754486	0.740552	0.630107	1.23161	1.08621	1.47377	0.972833	1.08347	0.945063	0.953423	0.838627	1.32475	0.607177	0.856353	1.10518	0.932991	0.904705	0.839232	1.4148	1.40596	1.06593	1.24371	0.594879	0.624989	0.712466
15	1.0535	0.479799	1.03506	1.45274	0.896515	1.06859	1.42907	1.26264	1.18712	0.915975	0.94372	1.11998	0.716243	0.799375	0.709763	1.03008	0.920764	1.06768	1.5101	0.857499	0.765242	0.770229	0.634898	1.26158	1.11682	1.46756	0.984811	1.08646	0.905461	0.965255	0.837503	1.33228	0.593048	0.856353	1.13262	0.928559	0.915803	0.861665	1.41218	1.42579	1.06935	1.2265	0.599128	0.611229	0.682719
20	1.06835	0.489447	1.05393	1.46448	0.901768	1.06404	1.42394	1.27101	1.19729	0.918801	0.962849	1.12684	0.725135	0.804442	0.718483	1.03771	0.929711	1.05492	1.50408	0.862095	0.768322	0.759326	0.62776	1.26344	1.11941	1.50193	0.974789	1.09799	0.899105	0.98002	0.842685	1.34284	0.619449	0.80587	1.13888	0.912284	0.941417	0.880004	1.37135	1.37891	1.03988	1.23067	0.578633	0.597832	0.679584
25	1.1012	0.54642	1.1258	1.48431	0.912058	1.05356	1.42849	1.24433	1.22407	0.922006	0.964469	1.1277	0.734269	0.807751	0.729995	1.06577	0.929662	1.01659	1.48365	0.874758	0.766904	0.769104	0.636365	1.27601	1.14283	1.46262	0.994834	1.11281	0.899496	0.985349	0.846059	1.35961	0.604586	0.915498	1.1693	0.866639	1.00347	0.91049	1.3834	1.37816	1.02729	1.24964	0.575316	0.571352	0.67593
30	1.33612	1.17179	1.54568	1.61589	1.24554	0.719241	1.53106	0.736647	1.01893	0.67802	0.688773	0.819297	0.711969	0.561662	0.622495	1.06944	0.822249	1.03028	1.47993	0.748277	0.72124	1.75357	0.646779	1.31209	2.93893	1.85898	1.78457	1.82789	1.90694	2.56443	2.15834	1.37873	1.10523	1.09408	1.26979	0.782523	1.16731	1.03007	1.32175	1.3969	1.15913	1.39868	0.659891	0.77683	0.804479
35	1.34973	1.11787	1.53668	1.63765	1.19542	0.736406	1.49811	0.720103	0.996522	0.686395	0.703904	0.827259	0.690772	0.561007	0.620048	1.22785	0.796385	1.80823	1.61472	2.79344	1.69481	2.67732	0.737472	3.15283	3.51399	2.37434	1.92992	2.72558	2.20337	2.80048	2.84942	1.12268	1.55772	1.01308	1.20862	0.927694	1.08387	1.10263	1.28164	1.33652	1.09992	1.33209	0.82162	0.733507	0.774239
40	1.32175	1.05404	1.50966	1.59976	1.15646	1.30227	1.4705	0.79524	1.01899	0.7048	0.718552	0.843354	0.673643	0.567866	0.619255	2.22283	1.97886	2.19545	1.68562	3.1122	2.16176	2.7223	1.37398	3.36321	3.38575	2.38177	1.93823	2.96382	2.26615	2.68177	2.96744	1.71915	1.4703	0.947033	1.17032	0.853748	1.03369	1.25386	1.27747	1.33727	1.02255	1.2832	0.578321	0.670826	0.757319
45	1.32277	1.02847	1.4812	1.57864	1.11824	2.00659	1.47092	2.00442	1.0211	0.719414	0.72324	0.881026	0.676572	0.582686	0.623046	2.53153	2.05078	2.36412	1.6929	3.25101	2.24009	2.59406	1.32851	3.40418	3.0881	2.33381	1.87722	3.05226	2.24038	2.47437	2.99946	2.97507	1.24848	0.860819	1.1313	0.868838	0.980835	1.3934	1.44359	1.50982	1.01882	1.24694	0.550311	0.633565	0.740425
50	1.3105	1.00709	1.48313	1.57939	1.13057	1.88706	1.447	2.19622	1.01158	0.72641	0.729409	0.869618	0.663716	0.582927	0.620185	2.40138	1.61208	2.37605	1.67608	3.25223	2.25876	2.53334	1.10826	3.37631	2.70749	2.25256	1.90108	3.03202	2.21936	2.36212	2.98074	3.11612	0.994834	0.803231	1.11655	0.86268	0.962665	1.29822	1.6727	1.7368	0.959948	1.21751	0.522068	0.579306	0.711144
55	1.3091	0.97809	1.45339	1.56964	1.10243	1.47664	1.44238	1.7291	1.03033	0.732477	0.735992	0.885438	0.657857	0.588545	0.629181	2.14803	1.66063	2.36227	1.65447	3.22368	2.28996	2.46	0.863073	3.313	2.39062	2.24092	1.82823	2.99721	2.1559	2.26756	2.95038	3.18231	0.875784	0.844003	1.11929	0.851041	0.967639	1.17867	1.70284	1.75404	0.907658	1.19072	0.482501	0.533546	0.671188
60	1.30878	0.945931	1.44497	1.55394	1.09182	1.06191	1.45017	1.11874	1.05663	0.737267	0.748124	0.886437	0.657306	0.601332	0.629216	2.08779	1.53347	2.42289	1.62465	3.18671	2.25671	2.42973	0.69699	3.24998	2.22053	2.14895	1.77538	2.98885	2.11028	2.191	2.92823	3.22451	0.789589	0.84698	1.11296	0.848875	0.976877	1.04952	1.60541	1.62715	0.871123	1.18644	0.471022	0.503437	0.663079
65	1.31516	0.99508	1.45253	1.543	1.10967	0.848766	1.45127	0.929623	1.05842	0.737026	0.749985	0.900189	0.657375	0.607226	0.629733	2.06828	1.45133	2.42739	1.62753	3.12888	2.19609	2.32159	0.620329	3.11465	2.10422	2.0766	1.76042	2.9601	2.03929	2.10627	2.87665	3.23003	0.754632	0.874861	1.11672	0.835815	0.985674	0.960669	1.49671	1.51166	0.865266	1.19559	0.458195	0.477759	0.652843
70	1.30787	1.02065	1.46223	1.55195	1.09916	0.800547	1.45341	0.922385	1.06459	0.741059	0.734303	0.897122	0.651894	0.607433	0.630008	2.02233	1.33663	2.37234	1.6113	3.05217	2.11522	2.23329	0.576865	2.9737	2.06139	1.99554	1.70013	2.91082	1.97559	2.01455	2.82052	3.20965	0.721044	0.917122	1.13739	0.808847	0.998329	0.928593	1.39044	1.38536	0.826425	1.27363	0.443322	0.457962	0.627113
75	1.2971	0.946039	1.43967	1.52939	1.10152	0.896398	1.43428	0.886954	1.04843	0.737509	0.736061	0.885679	0.647138	0.601815	0.636729	1.95627	1.05101	2.3012	1.59233	2.98724	2.05039	2.08207	0.565864	2.82184	1.95315	1.89951	1.68434	2.86829	1.94752	1.93931	2.72988	3.1719	0.69655	0.933296	1.14321	0.805024	1.0166	0.913299	1.2365	1.22453	0.818833	1.28985	0.433864	0.431584	0.622423
80	1.31093	0.968925	1.45365	1.55672	1.09247	0.827293	1.45616	0.854142	1.07007	0.741196	0.747814	0.897501	0.640831	0.62022	0.628113	1.79181	0.862046	2.34735	1.60328	2.91816	1.98062	1.93036	0.548899	2.60535	1.86764	1.86461	1.65804	2.80693	1.87971	1.84823	2.64182	3.09827	0.671811	0.915904	1.14125	0.814058	1.0033	0.915566	1.12581	1.06836	0.782039	1.22287	0.410932	0.406243	0.592262
85	1.318	1.05254	1.47499	1.53887	1.12216	0.783452	1.44431	0.880199	1.07414	0.759739	0.751605	0.907324	0.648861	0.642416	0.634075	1.54295	0.783674	2.32648	1.58593	2.84384	1.89795	1.77919	0.544695	2.38089	1.74057	1.78129	1.61159	2.7244	1.83087	1.73323	2.51256	3.03701	0.674158	0.933499	1.14579	0.795922	1.01589	0.916513	1.0489	0.988918	0.778722	1.15263	0.417385	0.401086	0.588401
90	1.31811	1.05216	1.48951	1.54895	1.11948	0.822571	1.446	0.893813	1.07062	0.766977	0.747435	0.895226	0.643933	0.626424	0.630319	1.29576	0.776927	2.2263	1.57747	2.77168	1.8293	1.61673	0.537019	2.36403	1.61203	1.70395	1.6026	2.6165	1.81884	1.64533	2.39561	3.04317	0.660077	0.929337	1.14717	0.793215	1.01386	0.908291	1.00524	0.951915	0.786521	1.07261	0.411166	0.40277	0.575679
95	1.32524	1.11401	1.50339	1.54402	1.13529	0.797756	1.45072	0.868377	1.08441	0.776318	0.759808	0.905704	0.637763	0.614085	0.627803	1.1373	0.762308	2.13688	1.56666	2.69062	1.69867	1.53146	0.543668	2.38353	1.50843	1.65168	1.56524	2.56854	1.74067	1.51494	2.22845	3.02332	0.647072	0.971226	1.14711	0.76503	1.03693	0.924769	0.99708	0.928284	0.805748	1.04007	0.422826	0.417488	0.605554
100	1.31393	1.10426	1.50623	1.5556	1.12559	0.767529	1.43776	0.885059	1.08724	0.772561	0.756017	0.915492	0.637005	0.641623	0.622598	1.07951	0.762993	2.2329	1.5584	2.61225	1.68938	1.50046	0.537605	2.22488	1.42239	1.58074	1.53782	2.41888	1.68689	1.47705	2.05166	3.02963	0.638125	0.975523	1.15631	0.731566	1.05514	0.928187	0.970106	0.929243	0.778644	0.955206	0.41539	0.392069	0.583659
105	1.31736	1.05693	1.49074	1.54611	1.12698	0.798273	1.45392	0.870927	1.07952	0.758257	0.753398	0.912356	0.635937	0.624046	0.623494	1.05062	0.772771	2.18469	1.554	2.52375	1.63535	1.5187	0.53169	1.92875	1.36259	1.50878	1.52232	2.32672	1.65481	1.43212	1.88827	2.94818	0.625707	0.972038	1.15282	0.75965	1.05003	0.924499	0.947588	0.894781	0.758278	0.899574	0.398599	0.379035	0.560572
110	1.31741	1.04557	1.50039	1.56272	1.12269	1.09806	1.46109	0.862001	1.0698	0.765323	0.7555	0.905531	0.625872	0.648172	0.616015	1.03688	0.767833	2.01103	1.54099	2.46538	1.53171	1.5164	0.530223	1.66136	1.34054	1.46673	1.47974	2.18249	1.61888	1.46688	1.78516	2.88892	0.619644	0.978399	1.15421	0.729942	1.07006	0.922705	0.931108	0.869776	0.752966	0.902062	0.398339	0.374916	0.576118
115	1.31441	1.03506	1.49305	1.53325	1.1057	1.23465	1.46027	0.876925	1.05112	0.745677	0.755328	0.909013	0.632766	0.643312	0.623873	1.03292	0.764019	1.88084	1.51367	2.41639	1.48907	1.40884	0.523134	1.54852	1.34162	1.43407	1.47118	1.99094	1.57341	1.44419	1.67457	2.7577	0.62028	0.986012	1.17184	0.748552	1.04871	0.935258	0.937405	0.882343	0.752551	0.869127	0.399427	0.369163	0.555001
120	1.33987	1.03356	1.49551	1.53282	1.11112	0.928314	1.45385	0.876201	1.05229	0.74323	0.738956	0.895536	0.619944	0.633558	0.614051	1.02808	0.754192	1.88866	1.51259	2.39439	1.41735	1.23792	0.522058	1.48829	1.32949	1.35179	1.46072	1.77249	1.54021	1.35648	1.5297	2.78376	0.623653	0.953834	1.15949	0.77332	1.05338	0.92345	0.920018	0.862779	0.732962	0.886048	0.382637	0.361597	0.563526
125	1.32036	0.988112	1.46169	1.5042	1.09327	0.803615	1.44686	0.854246	1.05281	0.753466	0.743747	0.921283	0.61891	0.638797	0.621495	1.02832	0.761722	1.85937	1.49753	2.3431	1.25528	1.11633	0.525236	1.46018	1.3403	1.31272	1.44253	1.56881	1.49298	1.221	1.36826	2.72298	0.610062	0.952582	1.16446	0.780628	1.03636	0.935834	0.925719	0.871045	0.755583	0.906467	0.400957	0.376625	0.575938
130	1.31473	1.01137	1.47429	1.50875	1.10844	0.865895	1.444	0.83522	1.05918	0.742713	0.7484	0.921076	0.609639	0.665129	0.627182	1.02055	0.749792	1.64171	1.49538	2.2901	1.1306	1.00119	0.538681	1.42933	1.32803	1.32935	1.41315	1.44756	1.47827	1.16776	1.2014	2.73877	0.614706	0.945511	1.16003	0.794907	1.02313	0.928897	0.9188	0.87203	0.753925	0.880374	0.402148	0.376937	0.565522
135	1.33328	1.05506	1.49927	1.51953	1.12896	0.850454	1.44951	0.836496	1.0203	0.753432	0.743299	0.914906	0.609018	0.652515	0.618635	1.03145	0.75561	1.49914	1.49958	2.23618	1.07668	0.939783	0.525334	1.42214	1.29551	1.27669	1.39002	1.40874	1.44717	1.0976	1.11159	2.64456	0.589674	0.935191	1.15177	0.808712	1.02354	0.919186	0.904238	0.85358	0.749028	0.863323	0.39352	0.365432	0.537511
140	1.32374	1.04627	1.50961	1.50521	1.13786	0.861346	1.44541	0.825363	1.01775	0.732304	0.73806	0.918146	0.618772	0.654445	0.628388	1.02172	0.757224	1.44976	1.45812	2.2242	1.03444	0.908052	0.537996	1.40958	1.30392	1.25391	1.38	1.36078	1.39559	1.05345	1.0316	2.43223	0.592168	0.915431	1.15201	0.816596	1.01518	0.920371	0.891827	0.837879	0.712984	0.822876	0.374578	0.341179	0.512066
145	1.31312	1.03045	1.4931	1.49916	1.13105	0.85397	1.44572	0.824467	1.03209	0.726307	0.745987	0.917974	0.61536	0.63573	0.629319	1.01415	0.749597	1.38508	1.44957	2.19217	0.9853	0.899252	0.529001	1.41202	1.29097	1.24667	1.33917	1.33028	1.36083	1.01419	0.990531	2.16005	0.589136	0.882948	1.1421	0.823329	0.996129	0.909814	0.888354	0.831711	0.713788	0.835753	0.381601	0.340893	0.517688
150	1.33563	1.061	1.49798	1.4968	1.12232	0.78683	1.45379	0.842458	1.03089	0.732787	0.737543	0.928727	0.6257	0.650481	0.621564	0.994003	0.746223	1.27806	1.46976	2.16641	0.971122	0.881211	0.525676	1.39119	1.27654	1.21685	1.34964	1.29815	1.32969	0.950343	0.953668	2.01426	0.597008	0.919965	1.16125	0.80675	1.01454	0.927476	0.878171	0.812122	0.687177	0.792325	0.359058	0.336617	0.491855
155	1.34158	1.08335	1.52483	1.48158	1.13443	0.735854	1.46247	0.819883	1.01961	0.730409	0.738922	0.914424	0.611879	0.638177	0.626286	1.00715	0.750672	1.33898	1.4328	2.12549	0.950196	0.853246	0.531396	1.38259	1.20521	1.16111	1.30715	1.31874	1.26872	0.853246	0.913968	1.9794	0.581265	0.893708	1.14971	0.821401	1.00445	0.920066	0.864748	0.816008	0.673159	0.779396	0.350195	0.327393	0.483537
160 (s)	1.33199	1.04637	1.50924	1.48458	1.1265	0.723205	1.47119	0.84587	1.01083	0.729443	0.746056	0.946133	0.60857	0.649413	0.617842	0.998598	0.756735	1.34035	1.41632	2.11194	0.926826	0.857939	0.522449	1.37335	1.19802	1.16532	1.29649	1.30602	1.43539	0.309333	0.002933	1.93804	0.504751	0.925784	1.16341	0.818761	1.0208	0.926799	0.849201	0.803986	0.679558	0.787739	0.356207	0.322393	0.485947

## Sheet: Fig. 5h-j, Fig. S9b
Fig. 5h-j, Fig. S9b
	DMSO					CTS 4h					CTS 24h
TG(40:0)	0.0962886	0.0970551	0.0956827	0.0949535	0.0974633	0.272001	0.29898	0.262143	0.272518	0.248805	0.27196	0.279766	0.274323	0.280414	0.276616
TG(42:1)	0.139008	0.133508	0.133699	0.13828	0.133774	0.0476433	0.0452279	0.0436896	0.042689	0.0448762	0.0557981	0.0537527	0.0522823	0.0544708	0.0516882
TG(44:0)	0.0805044	0.0845151	0.0850776	0.0796267	0.0837891	0.350439	0.305561	0.345362	0.339208	0.355472	0.281655	0.299977	0.262249	0.260172	0.281433
TG(44:1)	0.291063	0.279661	0.262226	0.281315	0.265342	0.206022	0.205213	0.205625	0.206853	0.206399	0.12686	0.130888	0.136756	0.129091	0.129536
TG(52:4)	0.274291	0.262257	0.29683	0.289162	0.285327	0.19894	0.201673	0.200357	0.214044	0.209566	0.142477	0.144829	0.144502	0.148907	0.147067
DG(28:1)	0.0613169	0.0596327	0.0601148	0.0581952	0.0589039	0.0969641	0.113666	0.116207	0.108392	0.118458	0.132117	0.135229	0.128474	0.135609	0.129155
DG(32:0)	0.146789	0.146804	0.146891	0.147384	0.146077	0.110956	0.10276	0.0962871	0.0995862	0.104345	0.156472	0.155221	0.143571	0.144199	0.140025
DG(36:4)	0.0245258	0.0244032	0.0257998	0.0262524	0.0264603	0.0228894	0.022909	0.0227395	0.0228447	0.0231623	0	0	0	0	0
CL(72:6)	0.113288	0.112622	0.114457	0.111307	0.114767	0.195102	0.18805	0.147042	0.175395	0.197322	0.0656242	0.0547169	0.0620507	0.0690427	0.02215
Cer(34:1)	0.132743	0.137612	0.130368	0.130484	0.135874	0.29308	0.280152	0.279767	0.308973	0.303428	0.208301	0.212004	0.2028	0.202037	0.205693
PS(32:1)	0.316128	0.317555	0.323901	0.337695	0.295143	0.28382	0.289139	0.278738	0.268464	0.250834	0.743594	0.741766	0.743649	0.693313	0.682715
PS(38:2)	0.361058	0.308323	0.364417	0.340147	0.350086	0.137011	0.145153	0.132286	0.124652	0.132568	0.111798	0.114581	0.109263	0.106375	0.107223
PI(34:1)	0.239413	0.246566	0.258203	0.25413	0.248458	0.113216	0.115563	0.113793	0.114242	0.117013	0	0	0	0	0
PI(36:1)	0.359156	0.352191	0.384945	0.363957	0.369844	0.136223	0.159851	0.153236	0.137811	0.141876	0.162536	0.161058	0.161441	0.160195	0.160059
PI(36:3)	0.0650067	0.0732357	0.071484	0.0659255	0.0646988	0.0273399	0.0291644	0.0264257	0.0293235	0.0269359	0.0598779	0.057714	0.0565792	0.0587991	0.0583
PI(40:4)	0.0714556	0.0733668	0.0726349	0.0722769	0.0742565	0.0398991	0.0444655	0.0254012	0.0364517	0.0432058	0.0177808	0.017614	0.0173385	0.0177386	0.017598
PE-P(36:2)	0.454393	0.433996	0.450016	0.468331	0.467627	0.229906	0.229736	0.230664	0.228988	0.234028	0.262252	0.259724	0.259863	0.259348	0.255554
PE-P(38:1)	0.275126	0.56151	0.273988	0.275051	0.278459	0.126729	0.114481	0.10898	0.103936	0.113927	0.157255	0.159477	0.155737	0.155424	0.160291
PE-P(38:3)	1.00532	1.0762	1.11001	1.01478	1.18989	0.461095	0.468677	0.463217	0.493212	0.482832	0.635333	0.63982	0.639788	0.640236	0.646002
PE-P(38:6)	1.27077	1.30247	1.26038	1.27198	1.28513	0.574806	0.604915	0.595524	0.670873	0.629223	0.840644	0.83922	0.839776	0.839507	0.836954
PE-P(40:1)	0.131135	0.121719	0.127019	0.127293	0.11672	0.0316258	0.034623	0.0309312	0.0304843	0.032361	0.0499364	0.0513972	0.0445677	0.0512734	0.0464384
PE-P(40:4)	0.745683	0.744317	0.748925	0.738017	0.744641	0.363704	0.334351	0.301368	0.313376	0.319214	0.444658	0.445752	0.424597	0.425267	0.430951
PE-O(36:1)	0.0542359	0.0538936	0.0552024	0.0538956	0.0543069	0	0	0	0	0	0.133563	0.132592	0.130733	0.132113	0.131562
PE-O(36:4)	0.430868	0.476389	0.430501	0.41826	0.469784	0.274501	0.277284	0.2455	0.27834	0.251324	0.279995	0.266953	0.263728	0.279457	0.270549
PE-O(38:2)	0.27592	0.28143	0.284125	0.275051	0.278459	0.120455	0.116446	0.100773	0.103936	0.113927	0.158808	0.154805	0.155737	0.155424	0.160291
PE-O(40:3)	0.214639	0.212902	0.213329	0.213379	0.212397	0.0821165	0.0842577	0.0718157	0.0709598	0.0750106	0.103444	0.108481	0.104325	0.106852	0.10286
PE(32:1)	0.727396	0.727946	0.729824	0.722638	0.738047	0.364068	0.344735	0.323417	0.360623	0.367877	0.329281	0.347679	0.345684	0.35378	0.331227
PE(32:2)	0.220761	0.215011	0.221002	0.226403	0.227094	0.0241238	0.0272071	0.0235274	0.0253606	0.0259508	0.353568	0.337459	0.37536	0.375257	0.36457
PE(38:1)	0.108287	0.105136	0.0995964	0.107533	0.110114	0.619423	0.628625	0.592526	0.667453	0.683275	1.02824	1.07855	1.11393	0.922159	0.9983
PE(38:2)	0.293399	0.259731	0.264839	0.283678	0.264546	1.18682	1.20601	1.16146	1.34783	1.38088	1.40111	1.40949	1.45516	1.61929	1.47126
PE(38:4)	2.23087	2.12005	2.00873	2.12976	2.24485	0.397291	0.405384	0.406313	0.408015	0.402154	0.513945	0.489594	0.510139	0.50013	0.486843
PE(40:2)	0.480701	0.473992	0.484889	0.480025	0.463354	0.0769246	0.0766878	0.0766065	0.0770076	0.0762125	0.481749	0.45266	0.485544	0.475186	0.459183
PC-P(30:0)	0.0371856	0.0306431	0.0324837	0.0335241	0.0309689	0.0703248	0.0753477	0.0787866	0.0747179	0.0796617	0.0904691	0.0898156	0.0838976	0.0993901	0.101763
PC-P(38:4)	0.0599329	0.0601783	0.0569067	0.0576713	0.0558858	0.0547506	0.0677097	0.0547286	0.0689167	0.0647364	0.0323572	0.0315941	0.0324027	0.0333407	0.032319
PC-P(40:0)	0.196119	0.193383	0.195953	0.191544	0.189915	0.0807916	0.0839796	0.0720257	0.079685	0.0672023	0.0752331	0.0791076	0.068917	0.0740818	0.0679366
PC-P(44:4)	0.0380674	0.0375198	0.036917	0.0364498	0.0386449	0.0148464	0.0151216	0.0149381	0.014916	0.014758	0.0172225	0.0179439	0.0162547	0.0169462	0.0142085
PC-O(30:1)	0.0240445	0.0250128	0.0236097	0.0233405	0.0240019	0.0560601	0.0596017	0.0583321	0.0622176	0.0632995	0.0706757	0.0678684	0.0702549	0.0702927	0.0723717
PC-O(34:1)	1.12787	1.09856	1.05512	1.17338	1.03788	0.562814	0.575313	0.566672	0.56987	0.57468	0.566408	0.589673	0.572145	0.511367	0.536319
PC-O(34:2)	0.124176	0.120562	0.121411	0.118496	0.122982	0.11495	0.121875	0.115869	0.119515	0.126491	0.0885827	0.0709588	0.0726937	0.0810778	0.0805333
PC-O(36:1)	0.197095	0.184565	0.189373	0.201251	0.194946	0.0859057	0.0812262	0.0725221	0.0763685	0.0801069	0.075499	0.0738817	0.0751016	0.0754801	0.0755455
PC-O(36:2)	0.161281	0.166547	0.164712	0.165358	0.157438	0.118721	0.118514	0.117574	0.120712	0.123112	0.101173	0.100783	0.0999962	0.102648	0.101264
PC-O(38:1)	0.0892751	0.0836466	0.0861105	0.0871891	0.0808976	0.0482749	0.0466645	0.0469318	0.0464959	0.0485123	0.0561952	0.0564691	0.0403146	0.0514539	0.0468135
PC-O(38:2)	0.0536942	0.0509772	0.0538668	0.0498084	0.0504095	0.0370456	0.037025	0.030447	0.0312502	0.0315877	0.0267566	0.0296589	0.0229549	0.0289396	0.0280362
PC-O(38:6)	0.0703945	0.0668494	0.0674834	0.0697965	0.0669117	0.064325	0.0690917	0.0615385	0.0736661	0.0720986	0.0340147	0.0350957	0.0341248	0.0344798	0.0346838
PC-O(40:1)	0.196884	0.195036	0.199313	0.190925	0.193021	0.0721304	0.076535	0.0698177	0.0778107	0.0652457	0.0789772	0.0797485	0.0789444	0.0793446	0.0777072
PC-O(44:5)	0.0362483	0.0298992	0.0349401	0.0365804	0.0329665	0.0154733	0.0146098	0.0143809	0.0137533	0.0142721	0.0189219	0.0191196	0.0139237	0.0184318	0.0166481
PC(28:0)	0.237603	0.231728	0.227487	0.231625	0.230196	0.420022	0.415664	0.409123	0.448991	0.434962	0.721502	0.737301	0.770043	0.757744	0.790459
PC(28:1)	0.0110509	0.01037	0.0112275	0.0115033	0.010649	0	0	0	0	0	0.0606673	0.0645842	0.0701892	0.0679387	0.0751043
PC(30:2)	0.0380925	0.0382695	0.0388672	0.0380968	0.0380217	0.0841223	0.100309	0.0918723	0.0947394	0.0933132	0	0	0	0	0
PC(32:2)	1.25838	1.25608	1.28526	1.25514	1.23703	0	0	0	0	0	3.03076	3.0451	3.03578	3.27877	3.40768
PC(38:2)	0.285541	0.274147	0.272089	0.271225	0.278947	0.164733	0.164767	0.141592	0.1519	0.148716	0.230085	0.19265	0.157751	0.147103	0.127599
LPE(16:0)	0.0286295	0.0237104	0.024155	0.0287423	0.0293244	0.057215	0.0558855	0.0559647	0.0580538	0.0589561	0.0767774	0.0780432	0.0786614	0.0747953	0.0730339
LPE(20:3)	0.0112247	0.011183	0.0117888	0.0106906	0.0115612	0.0820094	0.0902115	0.0889134	0.0933898	0.0949274	0.0615673	0.0614408	0.0624499	0.058052	0.0586962
LPE(20:4)	0.064383	0.0621154	0.0648018	0.0658091	0.0633936	0.299675	0.3197	0.311197	0.319405	0.306009	0.217797	0.209971	0.20914	0.192685	0.218991
LPC(14:0)	0.0147861	0.0147818	0.0146926	0.0145011	0.0151688	0.0213473	0.0244864	0.0227446	0.0241254	0.0226221	0.0379421	0.0368859	0.0393684	0.035247	0.03755
LPC(16:1)	0.0416272	0.0437544	0.0394598	0.0398656	0.0408892	0.0791403	0.0806133	0.0801758	0.0820586	0.0822423	0.120535	0.120277	0.120539	0.101291	0.106363
LPC(18:0)	0.11289	0.112562	0.110238	0.110224	0.116205	0.178945	0.171339	0.147768	0.158574	0.18333	0.275614	0.260356	0.26975	0.226709	0.258107
LPC(20:3)	0.0128126	0.0115487	0.0117417	0.0111524	0.0133182	0.0472318	0.0437247	0.0363937	0.0393237	0.0489508	0.077034	0.0734963	0.0748784	0.0673272	0.071332
LPC(20:4)	0.00528362	0.00660035	0.00599537	0.00602348	0.00655907	0.064573	0.0644396	0.0673866	0.0625017	0.063964	0.0843055	0.0795876	0.0755354	0.0802906	0.0841613
